# 1 **A druggable oxidative folding pathway in the endoplasmic reticulum of** 2 **human malaria parasites**

3  
4 David W. Cobb<sup>1,2</sup>, Heather M. Kudyba<sup>1,2,#</sup>, Alejandra Villegas<sup>1,2</sup>, Michael R. Hoopmann<sup>3</sup>,  
5 Rodrigo Baptista<sup>2,4</sup>, Baylee Bruton<sup>1</sup>, Michelle Krakowiak<sup>1,2</sup>, Robert L. Moritz<sup>3</sup>, and Vasant  
6 Muralidharan<sup>1,2,\*</sup>.

7  
8 1. Department of Cellular Biology, University of Georgia, Georgia, United States.

9 2. Center for Tropical and Emerging Global Diseases, University of Georgia, Georgia,  
10 United States.

11 3. Institute for Systems Biology, Seattle, Washington, United States.

12 4. Institute of Bioinformatics, University of Georgia, Georgia, United States.

13 #Current address: Laboratory of Malaria and Vector Research, National Institute of Allergy  
14 and Infectious Diseases, National Institutes of Health, Bethesda, Maryland, United States.

15 \*Address correspondence to: [vasant@uga.edu](mailto:vasant@uga.edu)

## 16 17 **Abstract**

18 Malaria remains a major global health problem, and there exists a constant need to  
19 identify druggable weaknesses in *P. falciparum* biology. The endoplasmic reticulum (ER)  
20 has many essential roles in the asexual lifecycle and may offer new drug targets, but it  
21 remains critically understudied. We generated conditional mutants of the putative redox-  
22 active, ER chaperone *PfJ2*, and show that it is essential for parasite survival. Using a  
23 redox-active cysteine crosslinker, we identify its substrates to be other mediators of  
24 oxidative folding, *PfPDI8* and *PfPDI11*, suggesting a redox-regulatory role for *PfJ2*.  
25 Knockdown of these protein disulfide isomerases in *PfJ2* conditional mutants show that  
26 *PfPDI11* is not essential, while *PfPDI8* is essential for asexual growth and may work in a  
27 complex with *PfJ2* and other ER chaperones. Finally, we show that these redox  
28 interactions in the parasite ER are sensitive to small molecule inhibition. Together these  
29 data build a model for how oxidative folding occurs in the *P. falciparum* ER and  
30 demonstrate its suitability for antimalarial drug development.

31

## 32 **Introduction**

33 Today, the majority of the world's population lives at risk for contracting malaria, a disease  
34 caused by eukaryotic parasites of the genus *Plasmodium*, with *P. falciparum* causing the  
35 most severe forms of the disease (World Health Organization, 2019). In 2018, the world  
36 saw approximately 228 million cases of malaria resulting in more than 400,000 deaths.  
37 These numbers reflect a concerted effort to combat malaria in the past few decades, but  
38 progress has stagnated, with the numbers of malaria cases/deaths largely unchanged in  
39 recent years. A major impediment in the fight against malaria is the rise of drug-resistant—  
40 including multidrug-resistant—*P. falciparum* parasites, highlighting the need for more  
41 research into the biology of this major human pathogen.

42

43 The morbidity and mortality of malaria is a direct result of asexual parasite replication  
44 inside of human red blood cells (RBCs) (Cowman et al., 2016). As such, many validated  
45 and proposed drug targets involve the processes that support this lifecycle: these include  
46 parasite signaling events, egress/invasion, metabolism, plastid function, and remodeling  
47 of the RBC (Absalon et al., 2018; Amberg-Johnson et al., 2017; Bowman et al., 2014;  
48 Favuzza et al., 2020; Hodder et al., 2015; Moura et al., 2009; Nasamu et al., 2017; Pino  
49 et al., 2017). Strikingly, all of these diverse aspects of *P. falciparum* biology, each  
50 promising drug targets on their own, are united in their reliance on the parasite secretory  
51 pathway that originates in the endoplasmic reticulum (ER). Therefore, the *P. falciparum*  
52 ER is likely an Achilles' heel, with inhibition of its function having far-reaching effects on  
53 parasite biology. In fact, the frontline antimalarial artemisinin and its derivatives were  
54 shown in recent years to induce ER stress, indicating that the *P. falciparum* ER is sensitive  
55 to drug treatment (Bridgford et al., 2018; Zhang et al., 2017). Additionally, a promising  
56 new class of antimalarial drugs has been shown to target ER function (LaMonte et al.,  
57 2020). And yet, despite being a potential drug target in its own right, the parasite ER  
58 remains critically understudied.

59

60 Proteins are co-translationally imported into the ER and must correctly fold, or risk  
61 inducing ER stress and cell death (Almanza et al., 2019). One aspect of this process is

62 the “oxidative folding” that occurs within the ER—the formation and reduction of disulfide  
63 bonds in proteins as they try to achieve their native states in the ER’s oxidizing  
64 environment. ER-resident, Thioredoxin (Trx) superfamily proteins catalyze oxidative  
65 folding and are therefore essential for ER function (Hatahet & Ruddock, 2009).  
66 Highlighting their importance, these ER Trx-domain proteins are proposed drug targets in  
67 other human diseases (Hoffstrom et al., 2010; Kaplan et al., 2015; Vatolin et al., 2016; Xu  
68 et al., 2012). How oxidative folding and Trx-domain proteins work in the *P. falciparum* ER  
69 is unknown, and the parasite encodes far fewer ER-resident members of the Trx  
70 superfamily relative to model eukaryotic systems (Galligan & Petersen, 2012; Mahajan et  
71 al., 2006; Mouray et al., 2007). This streamlined approach to oxidative folding suggests  
72 less redundancy between the family members: elucidation of their functions will reveal  
73 new insights into parasite biology and potentially provide novel targets for antimalarial  
74 drug development.

75  
76 We report here that a putative ER Trx-domain-containing chaperone *PfJ2* is essential for  
77 the *P. falciparum* asexual lifecycle. We identify *PfJ2* interacting partners and use a  
78 chemical biology approach to specifically identify its redox partnerships. We show that  
79 one such partner—*PfPDI8*, also a Trx-superfamily member—is another essential ER  
80 protein that mediates oxidative folding, and our data suggests that both proteins work  
81 together with other chaperones to promote protein folding in the ER. Finally, we  
82 demonstrate that the redox interactions between these essential proteins and their  
83 substrates are amenable to disruption by a small molecule inhibitor, and we suggest that  
84 the oxidative folding process of the *P. falciparum* ER is an exploitable drug target.

85

## 86 **Results**

### 87 ***PfJ2* is an essential, ER-resident Hsp40**

88 *PfJ2* is a putative ER-resident Hsp40 with a C-terminal thioredoxin (Trx) domain (Figure  
89 1A, B). It has similarity to a protein in the mammalian ER which has several Trx domains  
90 following an Hsp40 J-domain, suggesting *PfJ2* may catalyze disulfide bond reduction of  
91 client proteins (Cunnea et al., 2003; Oka et al., 2013; Ushioda et al., 2008) (Figure 1A).  
92 To investigate *PfJ2* function and its potential role in *P. falciparum* oxidative folding, we

93 generated a *PfJ2* conditional knockdown parasite line using the TetR-*PfDOZI* aptamer  
 94 system (referred to as *PfJ2*<sup>apt</sup> hereafter). In this knockdown system, protein expression is  
 95 regulated by the presence of anhydrotetracycline (aTc), with knockdown induced by  
 96 removal of aTc (Ganesan et al., 2016) (Figure 1C). Using CRISPR/Cas9 genome editing,  
 97 we modified the *pfj2* locus to encode a 3xHA-tag immediately upstream of the ER-  
 98 retention signal, as well as the regulatory aptamer sequences and a cassette to express  
 99 the TetR-*PfDOZI* fusion protein (Figure 1D). Correct integration of the construct into the  
 100 *pfj2* locus was determined by PCR, and expression of HA-tagged *PfJ2* was demonstrated  
 101 via western blot (Figure 1D).  
 102

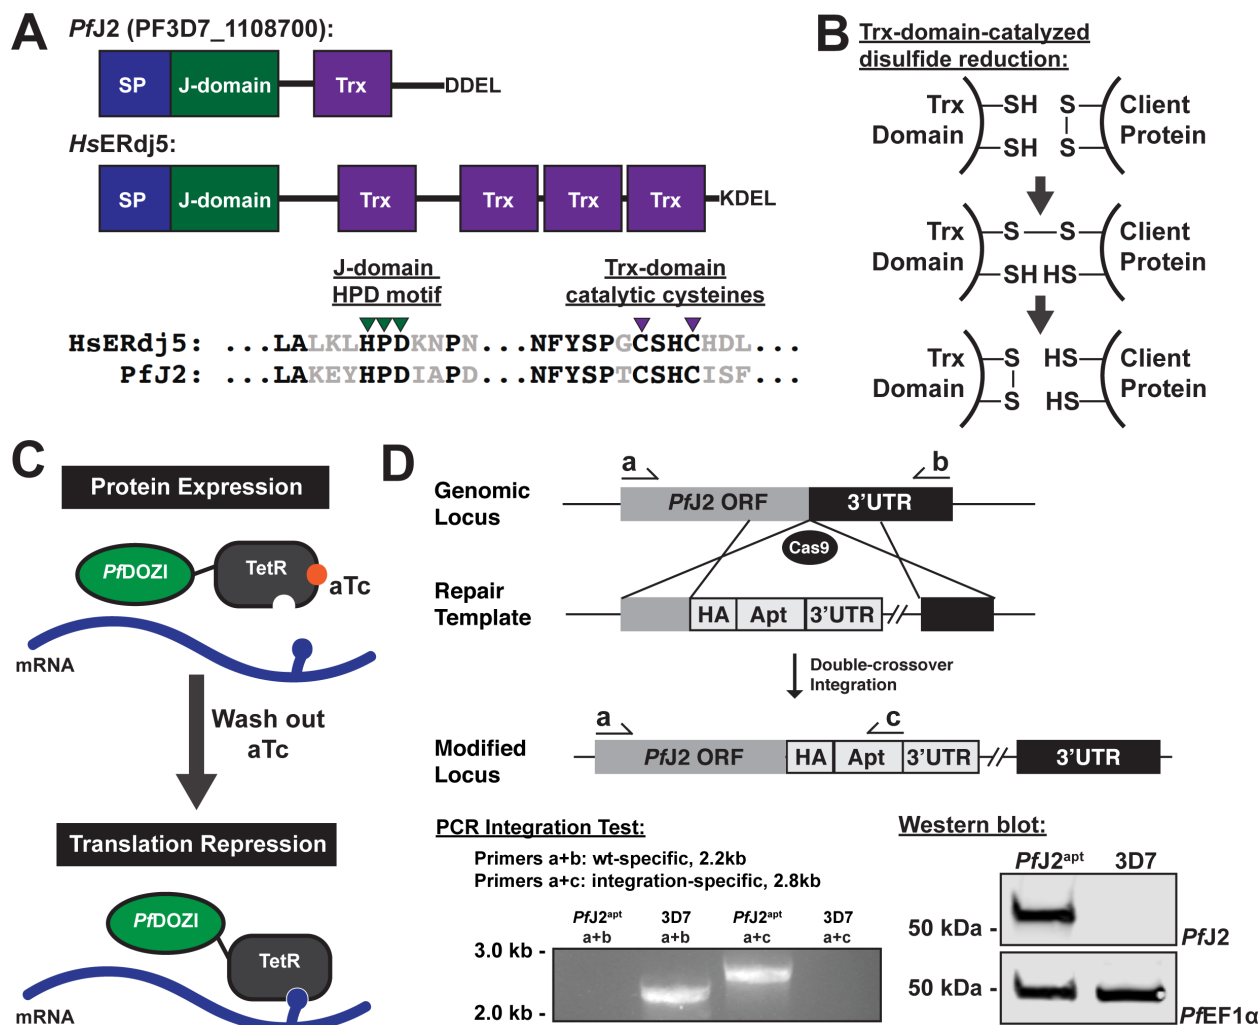

103  
104

105 **Figure 1. Generation of *PfJ2* (PF3D7\_1108700) conditional knockdown mutants**  
 106 **using CRISPR/Cas9. A)** Predicted domain structure of *PfJ2* and human homolog ERdj5,  
 107 showing signal peptide (SP), Hsp40 J-domain, thioredoxin domain (Trx), and C-terminal



108 ER retention signals. Essential, conserved residues are shown: the J-domain HPD motif  
109 is required for Hsp40 activity (i.e., stimulation of Hsp70 ATPase activity), and the Trx-  
110 domain CXXC motif is required for redox activity. Shown is homology between the PfJ2  
111 Trx-domain and the first ERdj5 Trx-domain active sites. **B)** Mechanism of disulfide bond  
112 reduction catalyzed by Trx-domain active site cysteines. **C)** Regulation of protein  
113 expression using the TetR-*PfDOZI* knockdown system. TetR binds to aptamer sequences  
114 present in the mRNA, and *PfDOZI* localizes the complex to sites of mRNA sequestration,  
115 repressing translation. Anhydrotetracycline (aTc) blocks TetR-aptamer interaction. **D)**  
116 Schematic of CRISPR/Cas9-mediated introduction of the TetR-*PfDOZI* knockdown  
117 system into the *pfj2* locus. A linearized repair template was transfected, along with a  
118 plasmid to express Cas9 and a gRNA, to introduce sequences for a 3xHA tag+*PfJ2*'s  
119 DDEL ER retention signal, stop codon, and a 3'UTR. Included in the repair template but  
120 not shown was a cassette to express the TetR-*PfDOZI* fusion protein and blasticidin  
121 deaminase for drug selection. Bottom left: two PCR integration tests were used to amplify  
122 either a sequence from only wild-type locus (primers a+b) or the modified locus (a+c).  
123 Bottom right: anti-HA western blot.

124  
125 Using an immunofluorescence assay (IFA), we assessed the localization of *PfJ2*  
126 throughout the asexual lifecycle (Figure 2A). We were especially keen to determine *PfJ2*'s  
127 localization given the presence of an apparent Plasmodium Export Element (PEXEL  
128 motif) downstream of the signal peptide (Botha et al., 2007). A processed PEXEL motif  
129 would mark *PfJ2* for export into the host RBC, in direct contrast to the "XXEL" ER retention  
130 signal at the C-terminus (Hiller, 2004; Külzer et al., 2009; Marti, 2004; Ilaria Russo et al.,  
131 2010). Co-localization between *PfJ2* and the ER-marker Plasmepsin V (*PfPMV*) revealed  
132 that *PfJ2* is in fact an ER-resident protein, and we were unable to detect *PfJ2* signal  
133 outside of the ER by IFA (Figure 2A). Using highly synchronized parasites, we showed  
134 that *PfJ2* is primarily expressed in the trophozoite and schizont stages, and that during  
135 knockdown conditions (removal of aTc), *PfJ2* expression is reduced (Figure 2B).  
136 Importantly, knockdown of *PfJ2* was found to inhibit expansion of parasites in culture, with  
137 an aTc EC<sub>50</sub> of approximately 0.5 nM (Figure 2C). Consistent with peak *PfJ2* expression  
138 during the trophozoite/schizont stages, we observed normal development of knockdown  
139 parasites in the beginning of the asexual life cycle, but the development of these parasites  
140 began to slow in the trophozoite stage and they failed to complete schizogony and  
141 produce new daughter parasites (Supplementary Figure 1, Figure 2D). These data  
142 demonstrate that *PfJ2* is a *bona fide* ER-resident protein essential for progression through  
143 the *P. falciparum* asexual lifecycle.

144

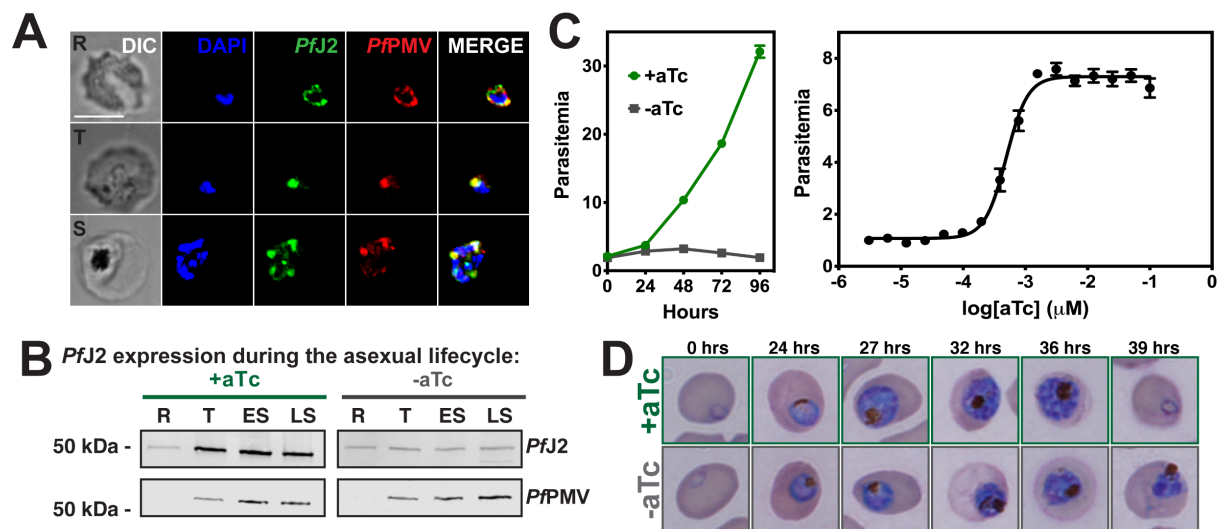

145  
146

147 **Figure 2. *PfJ2* is an essential, ER-resident protein.** **A)** *PfJ2*<sup>apt</sup> parasites were fixed with paraformaldehyde and glutaraldehyde and stained with DAPI (blue) and with antibodies against HA (green) and the ER-marker *PfPMV* (red). Ring (R), Trophozoite (T), and Schizont (S) stage parasites are shown. Z-stack Images were deconvoluted and shown as a single, maximum intensity projection. Scale bar represents 5  $\mu\text{m}$ . **B)** Parasites were tightly synchronized to the ring stage (0-3 hours) and split into two conditions: +aTc and -aTc. Samples were taken for western blot analysis at various time points in the life cycle (R = Ring, T = Trophozoite, ES = Early Schizont, LS = Late Schizont). Equal parasite equivalents were loaded into each lane, and blots were stained with antibodies for HA and *PfPMV*. **C)** Left: asynchronous parasites were grown in normal (+aTc) or *PfJ2* knockdown (-aTc) conditions, and parasite growth was monitored daily for 96 hours via flow cytometry. Right: asynchronous parasites were grown in a range of aTc concentrations and growth measured at 72 hours via flow cytometry. The aTc EC<sub>50</sub> was determined to be 0.5 nM. **D)** Parasites were tightly synchronized to the ring stage (0-3 hours) and split into two conditions: normal (+aTc) and *PfJ2* knockdown (-aTc). Samples from each condition were smeared and field-stained at time points throughout the lifecycle.

164

### 165 ***PfJ2* interacts with essential ER chaperones and proteins in the secretory pathway**

166 As a putative chaperone possibly involved in ER oxidative folding, we reasoned that the  
167 essentiality of *PfJ2* is likely related to its ability to interact with other proteins in the ER.  
168 We therefore took a co-immunoprecipitation (coIP) approach to identify *PfJ2* interacting  
169 partners. *PfJ2* was immunoprecipitated from *PfJ2*<sup>apt</sup> parasite lysates using anti-HA  
170 antibodies, and co-immunoprecipitating proteins were identified by tandem mass  
171 spectrometry (MS/MS) analysis. Control parental parasites (lacking HA-tagged *PfJ2*)  
172 were also used for immunoprecipitation and analyzed in the same manner. Each co-IP  
173 experiment was performed in triplicate, and the abundance of each identified protein was

174 calculated by summing the total MS1 intensities of all matched peptides for each selected  
175 protein, and normalizing by the total summed intensity of all matched peptides in the  
176 sample (Boucher et al., 2018; Florentin et al., 2019). Because *PfJ2* is an ER-localized  
177 protein, we further narrowed our list of interacting partners to those containing a signal  
178 peptide and/or at least one transmembrane domain (i.e. proteins predicted to be within  
179 the ER or traffic through the secretory pathway). We identified a stringent list of high-  
180 confidence interacting partners as those proteins which were present in all three *PfJ2*<sup>apt</sup>  
181 colP experiments, and were at least 5-fold more abundant compared to the controls, as  
182 previously described (Florentin et al., 2019) (Supplementary Figure 2). A complete list of  
183 identified proteins is provided in Supplementary Table 1.

184  
185 We identified other conserved proteins classically involved in essential ER processes—  
186 such as the Hsp70 Binding immunoglobulin Protein (BiP), the Hsp90 Endoplasmin, and  
187 the oxidoreductase Protein Disulfide Isomerase (PDI) (Table 1). We further identified  
188 proteins that are trafficked through the ER late in the parasite lifecycle and are required  
189 for egress and invasion, including PfMSP1 and proteins destined for rhoptries (Das et al.,  
190 2015; Ito et al., 2017; Richard et al., 2009; Sherling et al., 2017). Nearly half of the  
191 identified proteins lack empirical evidence for their subcellular localization, and many  
192 have no known function. But, given the presence of a signal peptide and/or  
193 transmembrane domains, these proteins likely have localizations in the ER, parasite  
194 plasma membrane, apicoplast, and other destinations that are part of the secretory  
195 pathway. Also of note, approximately two-thirds of the identified proteins are predicted to  
196 have essential functions (Supplementary Figure 2) (Zhang et al., 2018). These data  
197 together suggest that *PfJ2* may work with other ER-resident chaperones to ensure proper  
198 folding/functioning of proteins that have essential roles throughout the parasite.

199

|                | Gene ID       | Annotation                                                     | Fold Change | piggyBac Prediction |
|----------------|---------------|----------------------------------------------------------------|-------------|---------------------|
| <b>ER</b>      | PF3D7_1108700 | PfJ2                                                           | 31.2        | Essential           |
|                | PF3D7_0827900 | PDI8                                                           | 18.1        | Essential           |
|                | PF3D7_0917900 | BiP                                                            | 16.2        | Essential           |
|                | PF3D7_1444300 | 1-acyl-sn-glycerol-3-phosphate acyltransferase, putative       | 6.7         | Essential           |
|                | PF3D7_1222300 | Endoplasmic reticulum chaperone, putative                      | 6.7         | Essential           |
|                | PF3D7_1246800 | Signal Recognition Particle Receptor Subunit Beta, putative    | 623.0       | Dispensable         |
|                | PF3D7_1346100 | SEC61 subunit alpha                                            | 6.1         | Dispensable         |
| <b>Rhoptry</b> | PF3D7_0905400 | RhopH3                                                         | 6.8         | Essential           |
|                | PF3D7_0501600 | RAP2                                                           | 6.6         | Essential           |
|                | PF3D7_1410400 | RAP1                                                           | 5.3         | Dispensable         |
| <b>PPM</b>     | PF3D7_0930300 | MSP1                                                           | 6.1         | Essential           |
| <b>Unknown</b> | PF3D7_0318900 | Conserved Protein, Unknown Function                            | 725.0       | Essential           |
|                | PF3D7_1136800 | DnaJ protein, putative                                         | 72.8        | Essential           |
|                | PF3D7_1419200 | ATrx1                                                          | 15.4        | Essential           |
|                | PF3D7_1459400 | Conserved Protein, Unknown Function                            | 14.6        | Essential           |
|                | PF3D7_0710100 | Conserved Protein, Unknown Function                            | 7.3         | Essential           |
|                | PF3D7_0823800 | DnaJ protein, putative                                         | 6.6         | Essential           |
|                | PF3D7_1324900 | L-lactate dehydrogenase                                        | 6.3         | Essential           |
|                | PF3D7_0821000 | Conserved Plasmodium Protein, Unknown Function                 | 5.3         | Essential           |
|                | PF3D7_0912400 | alkaline phosphatase, putative                                 | 363.0       | Dispensable         |
|                | PF3D7_1143200 | DnaJ protein, putative                                         | 38.8        | Dispensable         |
|                | PF3D7_1409600 | Conserved Plasmodium Protein, Unknown Function                 | 12.8        | Dispensable         |
|                | PF3D7_0612100 | Eukaryotic Translation Initiation Factor 3 Subunit L, putative | 5.7         | Dispensable         |

201 **Table 1. Proteins identified as PfJ2 interacting partners.** Identified proteins were  
 202 categorized by subcellular localization (ER, Rhoptry, Parasite Plasma Membrane [PPM],  
 203 or Unknown). Also shown are GeneIDs and annotations from PlasmoDB.org, calculated  
 204 fold-change compared to control experiments, and essentiality as predicted by the  
 205 piggyBac mutagenesis screen performed by Zhang et al., 2018.

### 207 **PfJ2 is a redox-active protein in the *P. falciparum* ER**

208 We next sought to test the hypothesis that *PfJ2* contributes to ER oxidative folding by  
 209 determining whether its putative Trx domain is redox-active and capable of forming mixed  
 210 disulfides with its clients. To this end we employed the bifunctional, electrophilic  
 211 crosslinker divinyl sulfone (DVSF), which has been shown in model systems to have  
 212 remarkable specificity for redox-active, nucleophilic cysteines, like those present in Trx  
 213 domains (Allan et al., 2016; Araki et al., 2017; Naticchia et al., 2013). This specificity  
 214 allows DVSF to covalently and irreversibly trap Trx-domain proteins to their redox  
 215 substrates (Figure 3A). Therefore, we treated *PfJ2*<sup>apt</sup> parasite cultures with DVSF and  
 216 isolated proteins for western blot analysis. In the absence of DVSF, *PfJ2* was detected at  
 217 approximately 50 kDa, while the addition of DVSF resulted in additional bands containing  
 218 *PfJ2* to appear between 100-150 kDa (Figure 3A). To demonstrate specificity of DVSF  
 219 for redox-active cysteines, the ER-resident protein *PfPMV*—which contains 16 cysteines  
 220 after its signal peptide—was detected in the same samples and its migration pattern was  
 221 found to be unaffected by DVSF treatment (Figure 3A). As an additional control, *PfJ2*<sup>apt</sup>

222 parasite cultures were treated with the sulfhydryl-blocking compound N-ethylmaleimide  
223 (NEM) prior to the addition of DVSF. Pre-treatment with NEM resulted in the blockage of  
224 cross-linking between *PfJ2* and its redox partners (Figure 3B). These results demonstrate  
225 that *PfJ2* does have redox activity, and that DVSF is a useful chemical tool for trapping  
226 redox interactions in the ER of *P. falciparum*.

227

### 228 ***PfPDI8* and *PfPDI11* are *PfJ2* redox partners**

229 Having shown the redox activity of *PfJ2*, we next sought to specifically identify those redox  
230 partnerships. To identify the proteins trapped to *PfJ2* by DVSF, cultures were treated with  
231 the compound and immunoprecipitation of *PfJ2* was performed (Figure 3C). As a control,  
232 the immunoprecipitation was also performed in parallel using cultures that had not  
233 received DVSF treatment. The immunoprecipitated proteins were subjected to separation  
234 by SDS-PAGE and visualized using Coomassie (Figure 3C). Two bands between 100-  
235 150 kDa, corresponding to those previously detected by western blot, were extracted from  
236 the +DVSF sample, along with the corresponding areas of the gel in the untreated  
237 samples (Figure 3C, perforated boxes). Proteins present in these gel slices were  
238 identified via MS/MS analysis. By analyzing the untreated control samples, we were able  
239 to remove background proteins and found that the top gel slice primarily contained *PfJ2*,  
240 *PfPDI8*, *PfPDI11* and *PfBiP*, and the bottom slice contained *PfJ2*, *PfPDI8*, and *PfPDI11*  
241 (Figure 3C, table). The complete list of proteins identified in all samples can be found in  
242 Supplementary Table 2. Because alterations to *PfBiP* migration during SDS-PAGE after  
243 DVSF treatment were not detected (Supplementary Figure 3), we chose to focus our  
244 attentions on *PfPDI8* and -11.

245

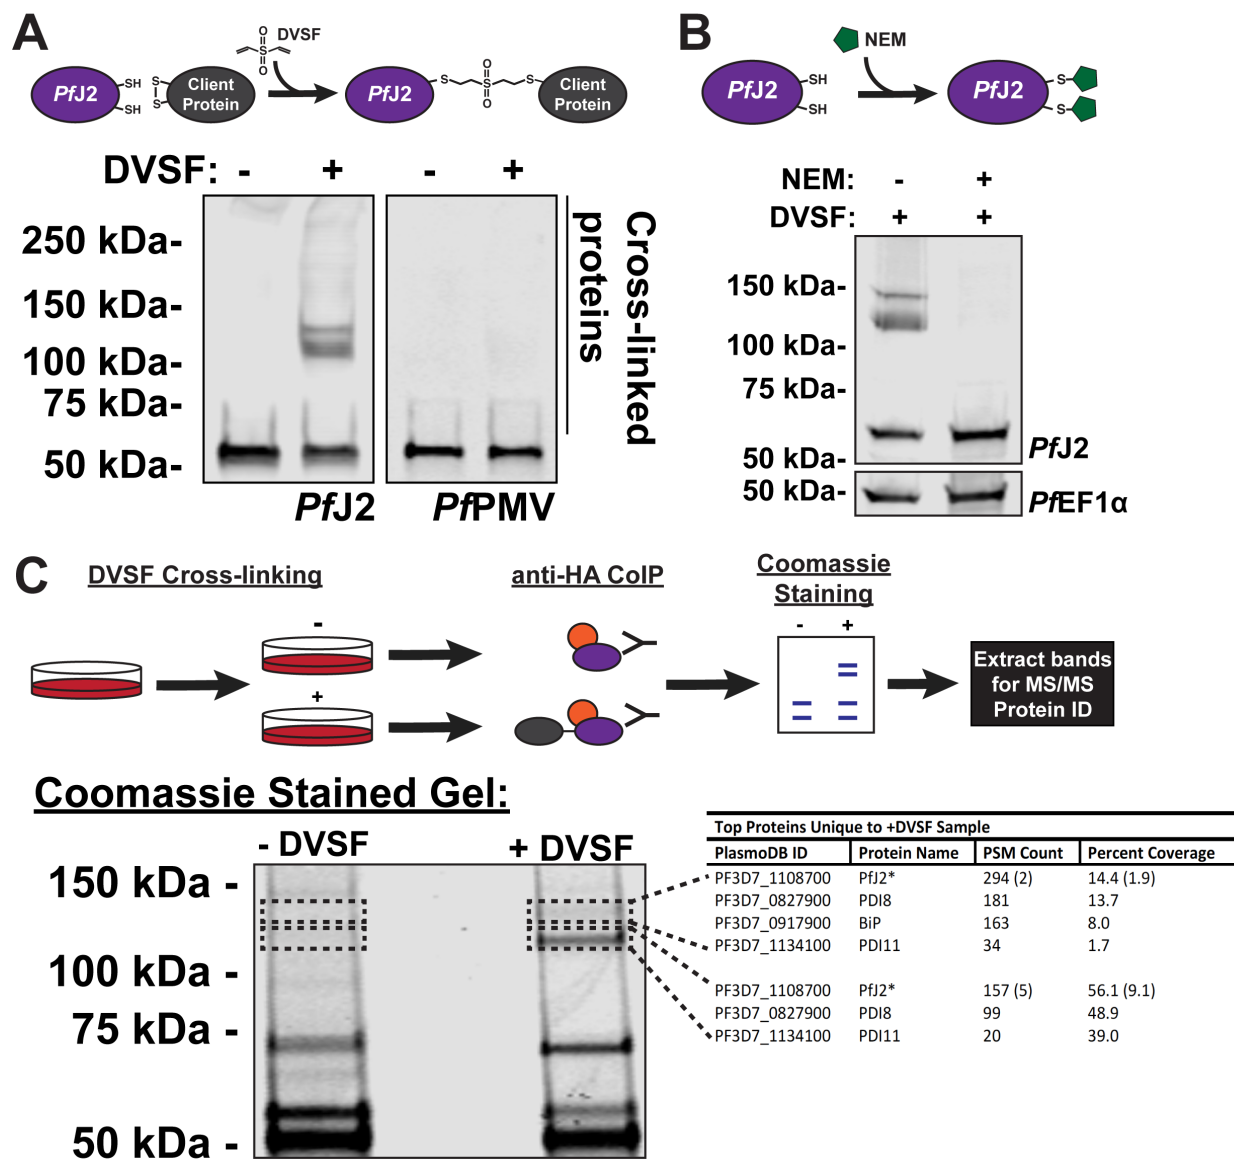

246  
247  
248  
249  
250  
251  
252  
253  
254  
255  
256  
257  
258  
259  
260

**Figure 3. *PfJ2* redox partners identified as *PfPDI8* and *PfPDI11*.** **A)** *PfJ2*<sup>apt</sup> parasites were incubated with 3 mM divinyl sulfone (DVSF) in 1x PBS for 30 minutes at 37°C, then samples were taken for western blot analysis. Membranes were incubated with antibodies against HA and *PfPMV*. **B)** *PfJ2*<sup>apt</sup> parasite cultures were incubated with 1 mM N-ethylmaleimide (NEM) for 3 hours prior to removal of NEM and addition of 3 mM DVSF as described above. Samples were taken for western blot analysis. Membranes were incubated with antibodies against HA and *PfEF1α*. **C)** *PfJ2*<sup>apt</sup> parasite cultures were evenly split into two conditions: 3 mM DVSF or PBS only for 30 minutes at 37°C, after which parasite lysates were used for anti-HA immunoprecipitation. Immunoprecipitated proteins were separated via SDS-PAGE and visualized using Coomassie. Bands unique to the DVSF-treated sample were extracted, along with the corresponding section of gel in the untreated sample. Proteins were identified by tandem mass spectrometry, and proteins identified in both plus and minus DVSF samples eliminated for further study. The GenID, protein name, PSM count, and percent coverage for all proteins with more than



261 1% coverage are shown in the table. A small amount of PfJ2 was identified in the -DVSF  
262 samples, and the PSM count and percent coverage is shown in parentheses.

263

### 264 ***PfPDI8* and *PfPDI11* are redox-active ER proteins**

265 Like *PfJ2*, *PfPDI8* and -11 are both predicted members of the Trx superfamily (Figure  
266 4A). *PfPDI8* appears to be a canonical PDI, with two Trx domains containing CXXC active  
267 sites that likely allow it to carry out disulfide oxidoreductase/isomerase activity. *PfPDI11*  
268 also has two Trx domains, but each contains an unusual CXXS active site. *PfPDI8* has  
269 been characterized recombinantly *in vitro*, but both *PfPDI8* and -11 remain unstudied *in*  
270 *vivo* (Mahajan et al., 2006; Mouray et al., 2007). In order to validate interaction between  
271 these PDIs and *PfJ2*, and to understand their roles in the *P. falciparum* ER, we used the  
272 *glmS* ribozyme to create conditional knockdown parasite lines for each protein in the  
273 background of *PfJ2*<sup>apt</sup> parasites (Prommana et al., 2013) (Figure 4B). Using  
274 CRISPR/Cas9 genome editing, we introduced sequences for a 3xV5 tag and the *glmS*  
275 ribozyme into the *pfpdi8* or the *pfpdi11* locus (*PfJ2*<sup>apt</sup>-PDI8<sup>glmS</sup> and *PfJ2*<sup>apt</sup>-PDI11<sup>glmS</sup>,  
276 respectively) (Figure 4C). Correct modifications of the loci were validated by PCR  
277 integration test, and V5-tagged proteins were visualized by western blot (Figure 4D, E).

278

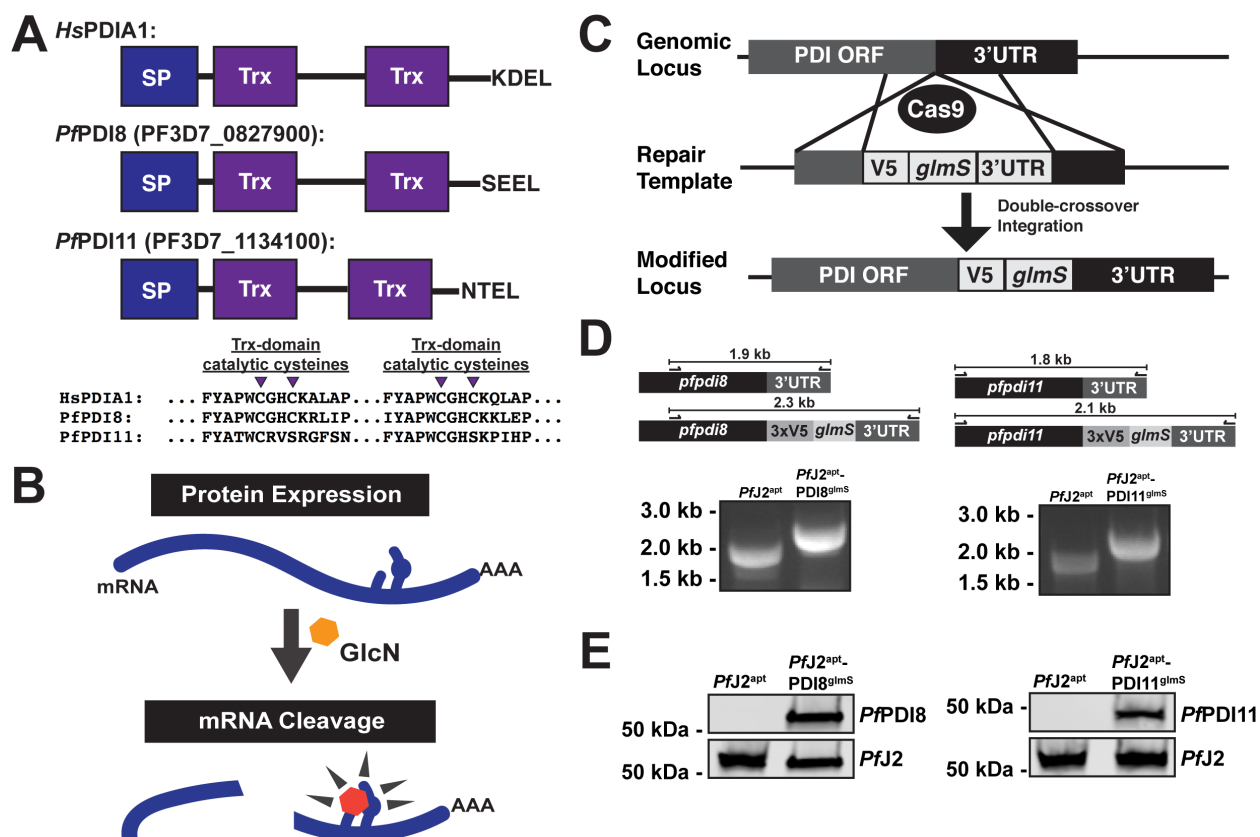

279  
280 **Figure 4. Generation of *PfpDI8* (PF3D7\_0827900) and *PfpDI11* (PF3D7\_1134100)**  
281 **conditional knockdown mutants using CRISPR/Cas9. A)** Predicted domain structure  
282 of *PfpDI8*, *PfpDI11*, and human PDIA1, showing signal peptide (SP), thioredoxin domains  
283 (Trx), and C-terminal ER retention signals. Essential, conserved cysteine residues are  
284 shown for each of the proteins' Trx domains. **B)** Regulation of protein expression using  
285 the *glmS* ribozyme system. The mRNA of interest encodes the ribozyme in the 3'UTR.  
286 Upon addition of glucosamine (GlcN, orange hexagon), which is converted to  
287 glucosamine-6-phosphate (pink hexagon) by the parasite, the ribozyme is activated to  
288 cleave the mRNA, leading to transcript instability and degradation (Prommana et al.,  
289 2013) **C)** Schematic of CRISPR/Cas9 mediated introduction of the *glmS* knockdown  
290 system into the genome. A repair template was transfected, along with a plasmid to  
291 express Cas9 and a gRNA, to introduce sequences for a 3xV5 tag, ER retention signals,  
292 stop codon, and *glmS* ribozyme. **D)** PCR integration test confirming correct modification  
293 of *pfpdi8* and *pfpdi11*. Correct integration results in increased amplicon size due to the  
294 V5 and *glmS* sequences. **E)** Western blots showing V5-tagged proteins in the *PfJ2<sup>apt</sup>-*  
295 *PDI8<sup>glmS</sup>* and *PfJ2<sup>apt</sup>-PDI11<sup>glmS</sup>* parasite lines at the predicted sizes for *PfpDI8* and -11.  
296

297 The subcellular localizations of *PfpDI8* and -11 were determined by IFA, and both  
298 proteins were found to co-localize with *PfJ2* in the ER (Figure 5A). To test the functionality  
299 of the *glmS* ribozyme knockdown system, each parasite line was treated with  
300 glucosamine (GlcN), and samples were taken for western blot analysis over the course  
301 of the parasite lifecycle. Compared to -GlcN control samples, protein levels were found

302 to be reduced during GlcN treatment (Supplementary Figure 4). In order to determine the  
303 effect that PDI knockdown had on parasite growth, each cell line was treated with GlcN  
304 and parasite growth was measured over the course of two life cycles. We observed  
305 dramatic inhibition of parasite growth during *PfPDI8* knockdown, but no growth defects  
306 were observed when *PfPDI11* was knocked down (Figure 5B). These results demonstrate  
307 that *PfPDI8* is essential for the asexual lifecycle and suggest that *PfPDI11* may be  
308 dispensable.

309  
310 *PfPDI8* contains two thioredoxin domains with classical CXXC active site cysteines,  
311 allowing the protein to function in oxidative folding as an oxidoreductase/isomerase  
312 (Mahajan et al., 2006; Mouray et al., 2007). *PfPDI11* has two thioredoxin domains  
313 containing noncanonical CXXS active sites, but likely maintains the ability to form mixed  
314 disulfide bonds with client proteins through the conserved cysteine residues (Anelli, 2003;  
315 Fomenko & Gladyshev, 2009; Park et al., 2009). To determine whether we could trap  
316 redox interactions between these PDIs and their substrates, *PfJ2<sup>apt</sup>-PDI8<sup>glmS</sup>* and *PfJ2<sup>apt</sup>-*  
317 *PDI11<sup>glmS</sup>* cultures were treated with DVSF, and protein lysates were collected for western  
318 blot analysis. Several high molecular weight bands containing *PfPDI8* appear following  
319 DVSF treatment, indicating that multiple substrates rely on the redox activity of *PfPDI8*,  
320 in contrast to *PfJ2*, whose western blot shows a narrower set of redox substrates (Figure  
321 5C). Similar results were observed for *PfPDI11* (Figure 5C).

322

323

324

325

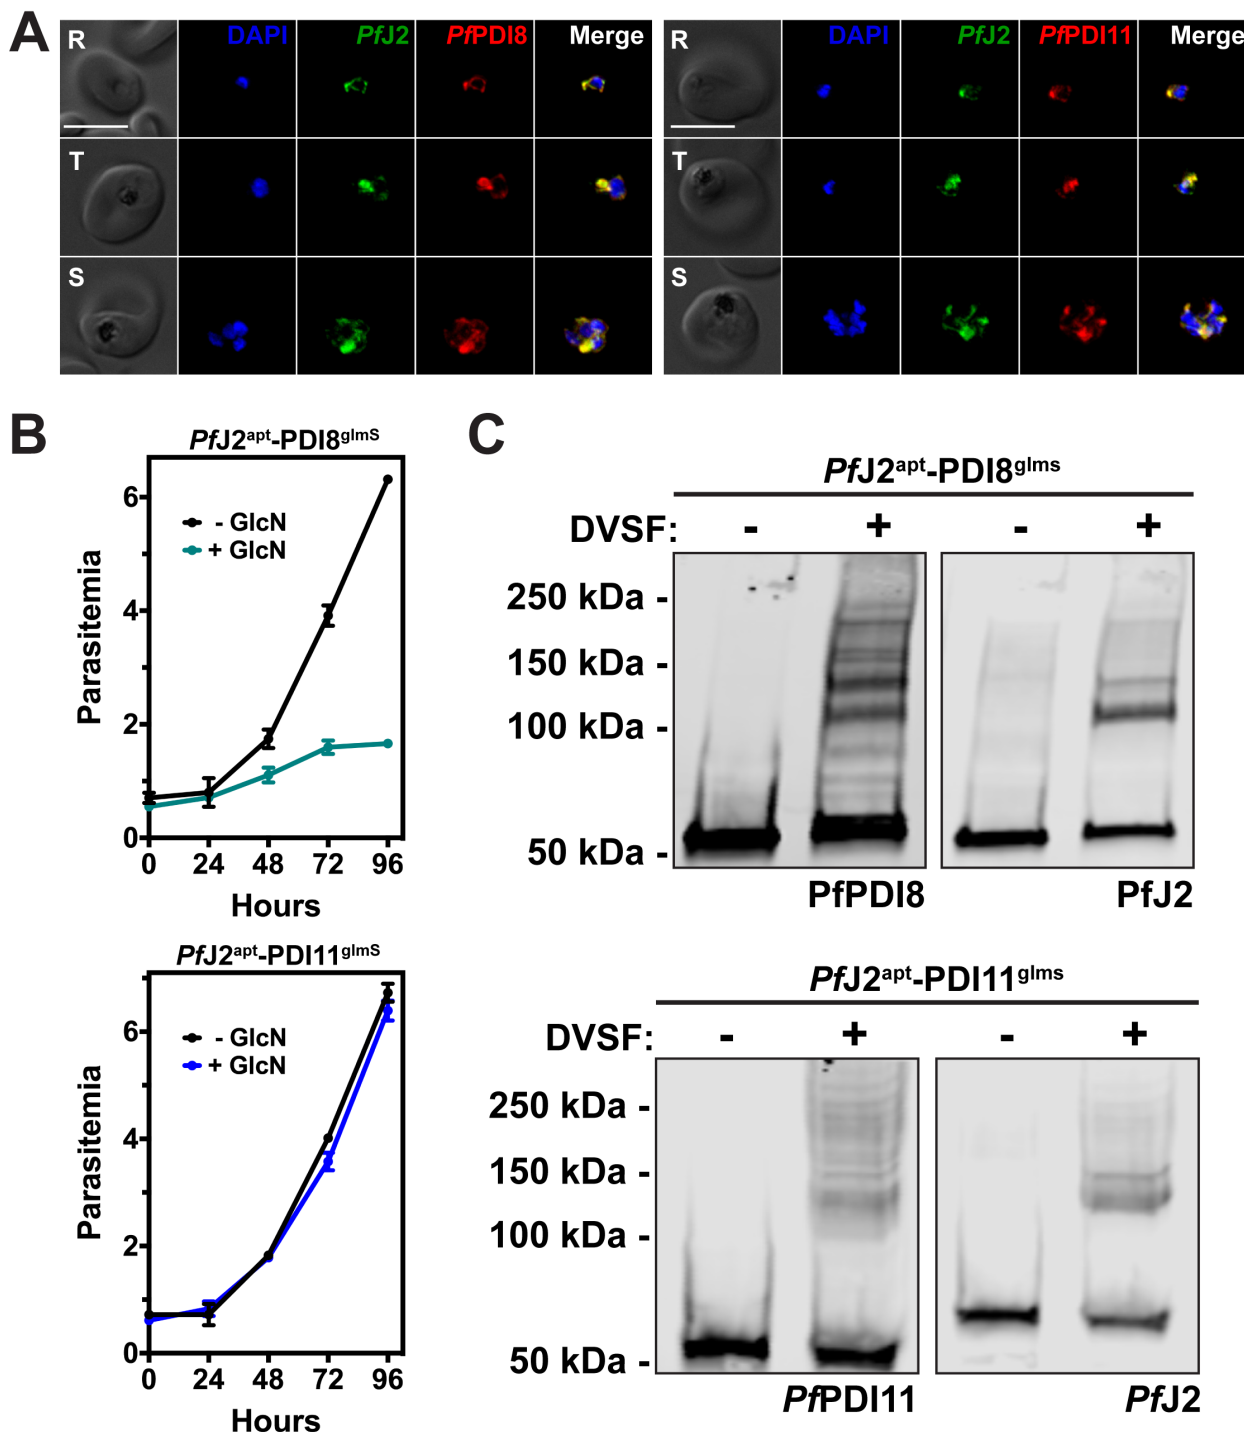

326  
327  
328  
329  
330  
331  
332  
333

**Figure 5. *PfpDI8* and *PfpDI11* are redox-active ER proteins. A)** *PfJ2<sup>apt</sup>-PDI8<sup>glms</sup>* and *PfJ2<sup>apt</sup>-PDI11<sup>glms</sup>* parasites were fixed with paraformaldehyde and glutaraldehyde and stained with DAPI (blue) and with antibodies against HA (green) and V5 (red). Ring (R), Trophozoite (T), and Schizont (S) stage parasites are shown. Z-stack Images were deconvoluted and shown as a single, maximum intensity projection. Scale bar represents 5  $\mu$ m. **B)** Asynchronous *PfJ2<sup>apt</sup>-PDI8<sup>glms</sup>* (top) and *PfJ2<sup>apt</sup>-PDI11<sup>glms</sup>* (bottom) parasites were grown in normal (-GlcN) or knockdown (+ 5mM GlcN) conditions, and parasite

334 growth was monitored daily for 96 hours via flow cytometry. **C)** *PfJ2*<sup>apt</sup>-*PfPDI8*<sup>glmS</sup> and  
335 *PfJ2*<sup>apt</sup>-*PfPDI11*<sup>glmS</sup> parasites were incubated with 3 mM DVSF in 1x PBS for 30 minutes at  
336 37°C, then samples were taken for western blot analysis. Membranes were incubated  
337 with antibodies against HA (*PfJ2*) and V5 (*PfPDI8* or -11).  
338

339 We next sought to determine if DVSF crosslinking occurs through Trx-domain cysteines.  
340 To do this, we attempted to generate parasites overexpressing either wild-type copies of  
341 *PfJ2*, *PfPDI8*, *PfPDI11*, or overexpressing these proteins with cysteine-to-alanine  
342 mutations in the Trx domain active sites. These types of mutations abolish DVSF-  
343 crosslinking in Trx proteins of model organisms (Araki et al., 2017; Naticchia et al., 2013).  
344 We were unable to generate parasites overexpressing wild-type or mutant copies of *PfJ2*.  
345 We were also unable to generate parasites overexpressing a mutant version of *PfPDI8*,  
346 but were successful in creating parasites overexpressing the wild-type protein;  
347 characterization of that parasite line revealed mislocalization of the overexpressed  
348 *PfPDI8* (Supplementary Figure 5). Given the essential nature of *PfJ2* and *PfPDI8*, we  
349 concluded that the parasites may be sensitive to their overexpression and to mutations in  
350 their Trx domains.

351  
352 In contrast, we were successfully able to generate both wild-type and cysteine-to-alanine  
353 *PfPDI11* overexpression mutants (*PfPDI11*<sup>wt</sup> and *PfPDI11*<sup>mut</sup>, respectively)  
354 (Supplementary Figure 6). Both parasite lines displayed the expected ER co-localization  
355 with *PfJ2* (Supplementary Figure 6). Importantly, treatment of these parasites with DVSF  
356 revealed extensive crosslinking between *PfPDI11* and substrates in the wild-type  
357 parasites, but crosslinking is abolished in parasites with cysteine-to-alanine mutations in  
358 the Trx domain (Supplementary Figure 6). These data demonstrated the specificity of  
359 DVSF for trapping redox partnerships in *P. falciparum*.

360  
361 Given the unusual nature of the *PfPDI11* CXXS Trx-domain active site, we took  
362 advantage of these overexpression parasites to further investigate *PfPDI11* function. Trx-  
363 domain-proteins with CXXS active sites are largely under-studied in all organisms (Anelli,  
364 2003; Fomenko & Gladyshev, 2009; Park et al., 2009). It is possible that the remaining  
365 active-site cysteines in *PfPDI11* forms mixed disulfides that may serve to retain proteins

366 the in ER, prevent their aggregation, and/or block cysteines from non-productive bond  
367 formation as they fold (Anelli, 2003; Park et al., 2009). Therefore, we hypothesized that  
368 we would be able to detect the mixed *PfPDI11*-substrate disulfide bonds by non-reducing  
369 SDS-PAGE and western blotting. Indeed, we were able to detect high-molecular-weight  
370 species of *PfPDI11* when *PfPDI11*<sup>wt</sup> parasite lysates were used for western blotting under  
371 non-reducing conditions (Supplementary Figure 7). In contrast, these species were  
372 missing when *PfPDI11*<sup>mut</sup> parasite lysates were used (Supplementary Figure 7).

373

### 374 **The *PfBiP-PfJ2-PfPDI8* oxidative folding complex**

375 Having shown that *PfJ2* and *PfPDI8* are redox partners and that both proteins are  
376 essential for the *P. falciparum* asexual lifecycle, we decided to focus on their interaction  
377 and what roles they may play together in the ER. To confirm the interaction between *PfJ2*  
378 and *PfPDI8*, *PfJ2* was immunoprecipitated from *PfJ2*<sup>apt</sup>-*PDI8*<sup>glmS</sup> parasites, and *PfPDI8*  
379 was found to co-immunoprecipitate (Figure 6A). When performing the reciprocal co-IP,  
380 we were unable to detect *PfJ2* pulling down with *PfPDI8*, perhaps due to inefficiency of  
381 the anti-V5 IP (Supplemental Figure 8). However, we were able to detect a band of  
382 overlapping *PfJ2/PfPDI8* signal when the *PfPDI8* IP was performed on cultures treated  
383 with DVSF, showing that the two proteins are interacting, redox partners (Figure 6B).

384

385 Our observations using the redox crosslinker DVSF showed that *PfPDI8* is a major redox  
386 partner for *PfJ2*, whereas *PfPDI8* has multiple other redox partnerships (Figures 3C, 5D).  
387 One explanation for this observation is that *PfJ2* may work upstream to prime *PfPDI8* for  
388 interaction with its substrates. Therefore, we asked whether we could detect  
389 *PfPDI8*+substrates co-immunoprecipitating with *PfJ2*. When *PfJ2* was  
390 immunoprecipitated from *PfJ2*<sup>apt</sup>-*PDI8*<sup>glmS</sup> parasites treated with DVSF, we were able to  
391 detect *PfPDI8* trapped to other substrates, indicated by smearing of the *PfPDI8* signal  
392 above 150 kDa (Figure 6C). Together, these results confirm the interaction between *PfJ2*  
393 and *PfPDI8* and suggest that *PfJ2* may be part of a complex including *PfPDI8* and its  
394 substrates.

395



396 Oxidative folding in the ER, mediated by proteins such as *PfJ2* and *PfPDI8*, is only one  
397 aspect of protein folding in the ER, and likely works in conjunction with other folding  
398 determinants, such as the Hsp70 BiP. *PfJ2* is an ER Hsp40—a class of co-chaperones  
399 that interact with the Hsp70 BiP—and BiP is likely involved in the folding of the same  
400 substrates that interact with *PfPDI8*. Such interactions between oxidative folding  
401 chaperones and BiP likely exist in the ER of other organisms, but it is not known how  
402 these types of proteins might work together to ensure substrates reach their native states.  
403 Given the smaller repertoire of ER Trx-superfamily proteins present in *P. falciparum*, the  
404 parasite is an ideal choice for investigating the relationship between these proteins and  
405 BiP. Therefore, we next asked whether *PfBiP* interacts with *PfJ2* and/or *PfPDI8*.

406  
407 Western blot analysis of proteins co-immunoprecipitating with *PfJ2* revealed that *PfBiP*  
408 does interact with *PfJ2*, consistent with our *PfJ2* co-IP experiments and the proteins'  
409 predicted chaperone/co-chaperone roles (Table 1, Figure 6D, top). Lack of a suitable  
410 antibody precluded reciprocal *PfBiP* immunoprecipitation to probe for *PfJ2*. However, as  
411 a control we showed that *PfBiP* is not detected when wild-type parasites (lacking HA-  
412 tagged *PfJ2*) are subjected to anti-HA immunoprecipitation, ruling out nonspecific binding  
413 during the co-IP experiment (Supplementary Fig 9).

414  
415 Next, we found that when *PfPDI8* was immunoprecipitated, *PfBiP* was detected (Figure  
416 6D, bottom). We further reasoned that because the same substrates may rely on both  
417 *PfPDI8* and *PfBiP* to achieve their native state, trapping the *PfPDI8*-substrate interaction  
418 with DVSF may increase the amount of *PfBiP* co-immunoprecipitating with *PfPDI8*. To  
419 test this hypothesis, parasite cultures were equally split into +/- DVSF treated aliquots,  
420 *PfPDI8* was immunoprecipitated, and lysates probed for *PfPDI8* and *PfBiP*. Consistent  
421 with our hypothesis, we detected a two-fold increase in the amount of *PfBiP* that pulled  
422 down with *PfPDI8* crosslinked to its substrates, with no significant difference in the starting  
423 amount of *PfBiP* detected in the sample prior to immunoprecipitation (Figure 6E). These  
424 results suggest that *PfJ2* and *PfPDI8* work together with the major ER folding chaperone  
425 *PfBiP* to help substrates reach their native states.

426

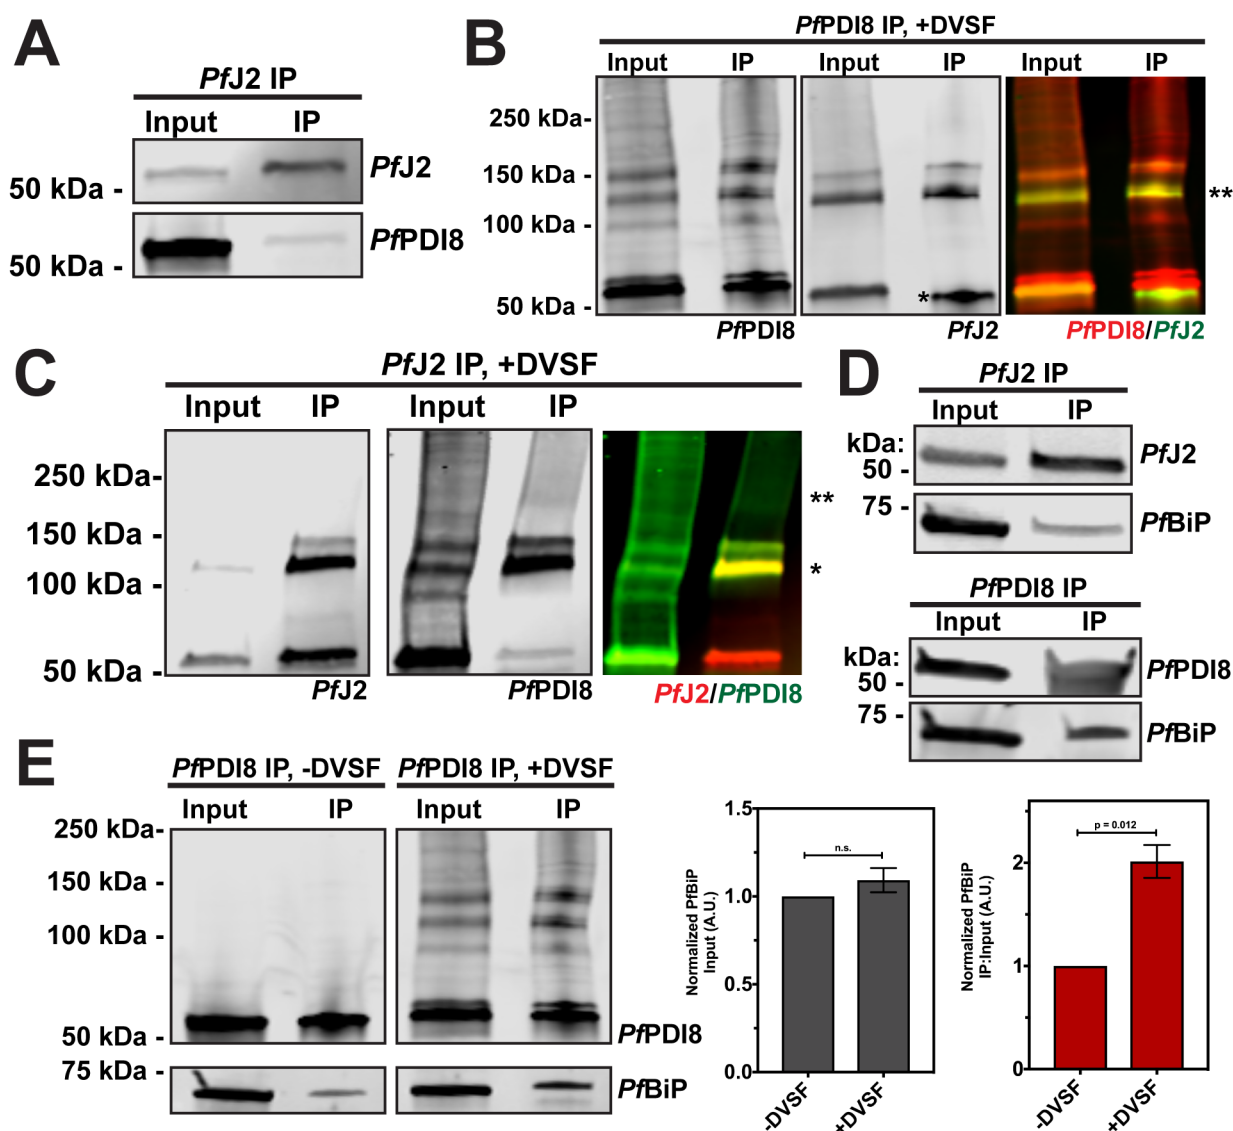

427  
 428 **Figure 6. The *PfBiP*-*PfJ2*-*PfPDI8* oxidative folding complex.** **A)** *PfJ2* and interacting  
 429 proteins were immunoprecipitated from *PfJ2*<sup>apt</sup>-PDI8<sup>glmS</sup> parasite lysate using anti-HA  
 430 antibodies. Input and eluted IP samples were used for western blot analysis. Membrane  
 431 was probed with HA and V5 antibodies to detect *PfJ2* and *PfPDI8*, respectively. **B)** *PfJ2*<sup>apt</sup>-  
 432 PDI8<sup>glmS</sup> parasites were incubated with 3 mM DVSF as described above, then V5  
 433 antibodies were used to immunoprecipitate *PfPDI8* and interacting proteins. Input and  
 434 eluted IP samples were used for western blot analysis. Membrane was probed with V5  
 435 and HA antibodies to detect *PfPDI8* and *PfJ2*, respectively. Antibody heavy chain is  
 436 indicated by the single asterisk (\*) in the *PfJ2* panel. A merged image of the *PfPDI8* (red)  
 437 and *PfJ2* (green) signal is shown, with the yellow overlap in signal indicated by a double  
 438 asterisk (\*\*). **C)** *PfJ2*<sup>apt</sup>-PDI8<sup>glmS</sup> parasites were incubated with 3 mM DVSF as described  
 439 above, then HA antibodies were used to immunoprecipitate *PfJ2* and interacting proteins.  
 440 Input and eluted IP samples were used for western blot analysis. Membrane was probed  
 441 with HA and V5 antibodies to detect *PfJ2* and *PfPDI8*, respectively. A merged image of  
 442 the *PfJ2* (red) and *PfPDI8* (green) signal is shown, with a single asterisk (\*) indicating the  
 443 yellow overlap in signal and a double asterisk (\*\*) indicating *PfPDI8*+substrates that co-

444 immunoprecipitated with *PfJ2*. **D)** *PfJ2* and *PfPDI8* were immunoprecipitated from *PfJ2*<sup>apt</sup>  
445 and *PfJ2*<sup>apt</sup>-*PDI8*<sup>glmS</sup> parasite lysates, respectively. Input samples and eluted IP proteins  
446 were used for western blot analysis. Membrane was probed with HA and *PfBiP* antibodies  
447 (top) or V5 and *PfBiP* antibodies (bottom). **E)** *PfJ2*<sup>apt</sup>-*PDI8*<sup>glmS</sup> parasite cultures were  
448 evenly split into two conditions: 3 mM DVSF or PBS only for 30 minutes at 37°C, after  
449 which parasite lysates were used for anti-V5 immunoprecipitation. Input and eluted IP  
450 proteins were analyzed by western blot using V5 and *PfBiP* antibodies. The *PfBiP* signal  
451 was measured for each lane and the ratio of IP-to-Input signal was determined. N = 3  
452 biological replicates.

453

#### 454 **ER redox interactions are druggable**

455 Our data have shown that *PfJ2* and *PfPDI8*, which participate in ER redox partnerships  
456 with each other as well as other substrates, are essential proteins in the *P. falciparum*  
457 asexual lifecycle. These proteins, through inhibition of their redox interactions, may  
458 represent unexploited targets for antimalarials. Further, our data show that DVSF can  
459 target these redox partners, suggesting that these proteins may be druggable. Indeed,  
460 consistent with the idea of targeting ER redox proteins in disease, high-throughput drug  
461 screens have identified potent inhibitors of human PDI in an effort to combat upregulation  
462 that is associated with some cancers and neurodegenerative diseases (Hoffstrom et al.,  
463 2010; Kaplan et al., 2015; Vatolin et al., 2016; Xu et al., 2012).

464

465 We tested four of these commercially available PDI inhibitors—16F16, LOC14, CCF642,  
466 and PACMA31—for activity against cultured asexual *P. falciparum* parasites. In contrast  
467 to their reported, highly potent activity against human cells, we observed a wide range of  
468 IC<sub>50</sub> values for *P. falciparum* (Supplementary Fig 10). The compound with the best anti-  
469 *Plasmodium* activity was 16F16, with an IC<sub>50</sub> value of approximately 4 μM (Figure 7A)  
470 (Harbut et al., 2012).

471

472 16F16 inhibits human PDI function by covalently binding the cysteines of the Trx domain  
473 active sites, thereby blocking their ability to catalyze oxidative folding (Hoffstrom et al.,  
474 2010; Kaplan et al., 2015). If 16F16 behaves similarly in *P. falciparum*, we reasoned that  
475 treatment of cultures with 16F16 prior to performing redox crosslinking with DVSF would  
476 prevent crosslinking from occurring, assuming that both compounds rely on the same  
477 redox-active cysteine residues for their activity. Indeed, pre-treatment with increasing

478 amounts of 16F16 significantly and reproducibly decreased the amount of crosslinked  
 479 *PfJ2* detected by western blot (Figure 7B). Our data indicate that after DVSF treatment,  
 480 the high molecular weight bands detected consist of *PfJ2*, *PfPDI8*, and *PfPDI11* (Figure  
 481 3). Therefore, the observed reduction in *PfJ2* crosslinking likely occurs due to direct  
 482 reaction of 16F16 with the *PfJ2* Trx-domain active site and/or the *PfPDI8* and -11 active  
 483 sites. Similar experiments showed that pre-treatment of cultures with 16F16 also blocked  
 484 crosslinking of *PfPDI8* and -11 with their substrates, though to a lesser extent than what  
 485 was observed for *PfJ2* (Figure 7C, D).

486  
 487 These data demonstrate that redox interactions within the *P. falciparum* ER, occurring  
 488 between essential proteins like *PfJ2* and *PfPDI8* and their substrates, are sensitive to  
 489 small molecule inhibition. Additionally, the disparity in activity observed for the PDI  
 490 inhibitors against human and *P. falciparum* cell lines suggest that development of  
 491 *Plasmodium*-specific inhibitors is likely possible (Supplementary Figure 10).

492

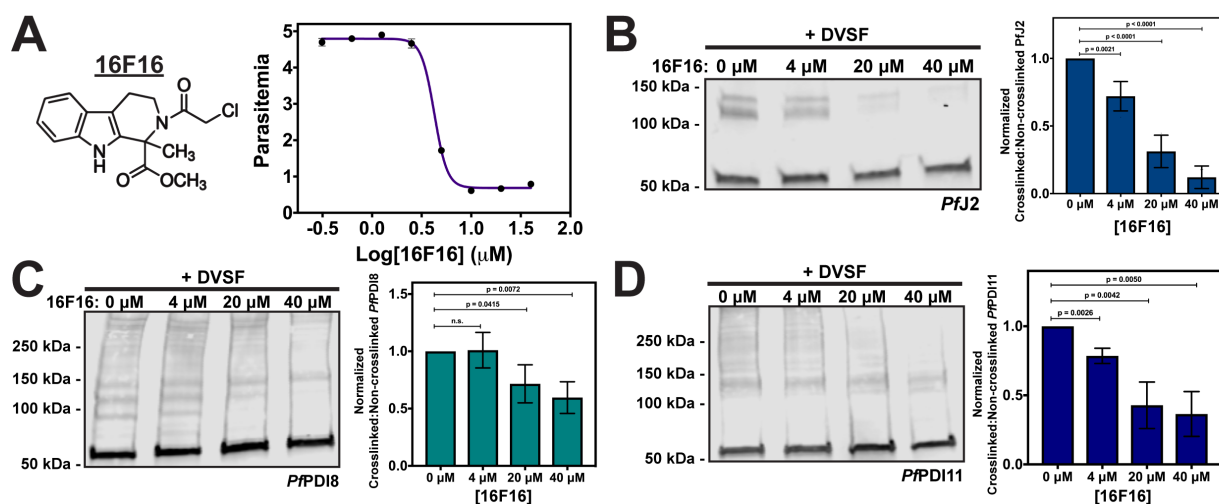

493  
 494 **Figure 7. ER redox interactions are sensitive to interruption by a small molecule.**  
 495 **A)** Asynchronous *PfJ2*<sup>apt</sup> parasites were incubated in various concentrations of the human  
 496 PDI inhibitor 16F16. Parasite growth was determined via flow cytometry at 72 hours and  
 497 the 16F16 IC<sub>50</sub> was determined to be approximately 4 μM. Each data point in the curve  
 498 represents the mean parasitemia at a given concentration, in technical triplicate. Error  
 499 bars, which are not shown for data points in which they are smaller than the circle symbol,  
 500 represent standard deviation from the mean. **B)** *PfJ2*<sup>apt</sup>, **C)** *PfJ2*<sup>apt</sup>-*PDI8*<sup>glmS</sup>, and **D)**  
 501 *PfJ2*<sup>apt</sup>-*PDI11*<sup>glmS</sup> parasites cultures were equally split and incubated with three  
 502 concentrations of 16F16 for 3 hours prior to removal of 16F16, then incubation with 3 mM  
 503 DVSF as described above. Samples were taken for western blot analysis, loading equal

504 parasite equivalents into each gel. Membranes were incubated with antibodies against  
505 HA or V5. Signal for non-crosslinked (the band at approximately 50 kDa) and crosslinked  
506 proteins (>50 kDa) was measured. Inhibition was measured by determining the ratio of  
507 crosslinked to non-crosslinked signal. N = 3 biological replicates for each parasite line.

508

## 509 **Discussion**

510 The ability to conduct oxidative folding likely underlies the diverse functions of the *P.*  
511 *falciparum* ER. The oxidizing environment of the ER encourages disulfide bond formation,  
512 but only the correct bonds allow proteins to reach their native states. Therefore,  
513 organisms must maintain a way to reduce/isomerize nonproductive disulfides. We have  
514 used CRISPR/Cas9 genome editing and conditional knockdown to show here that a  
515 putative disulfide reductase in the *P. falciparum* ER—*PfJ2*—is essential for the parasite  
516 asexual lifecycle (Figures 1, 2).

517

518 A co-IP/mass spectroscopy approach with stringent parameters for identifying interacting  
519 partners places *PfJ2* in the broader context of ER biology, revealing that *PfJ2* interacts  
520 with other folding determinants, such as BiP and Endoplasmin, as well as other members  
521 of the Thioredoxin superfamily, such as PDIs. The remaining proteins that were identified,  
522 most with unknown localization throughout the secretory pathway and many with no  
523 known function, may represent substrates that rely on *PfJ2* and these other chaperones  
524 for their folding and/or trafficking. Among the proteins identified were large, complex  
525 proteins such as *PfMSP1* and *PfRhoph3* (Table 1). Both proteins have numerous  
526 cysteine residues that must navigate oxidative folding when they are synthesized into the  
527 ER, likely relying on *PfJ2* and *PfPDIs* to do so correctly. Consistent with this hypothesis,  
528 a recent study identified *PfJ2*, *PfPDI11*, and *PfEndoplasmin* as potential contributors to  
529 folding and trafficking of *PfEMP1*, a cysteine-rich transmembrane protein that serves as  
530 the major *P. falciparum* virulence factor (Batinovic et al., 2017).

531

532 One major *PfJ2* redox substrate—*PfPDI8*—was identified using a chemical biology  
533 approach. DVSF is a redox-specific crosslinker that has been used to identify redox  
534 partnerships between Thioredoxin proteins in the cytoplasm of model organisms (Allan et  
535 al., 2016; Araki et al., 2017; Naticchia et al., 2013). To our knowledge, this compound had  
536 not yet been used to trap and define redox partnerships in *Plasmodium*, nor in the ER of



537 any organism. We demonstrate its utility in the *Plasmodium* ER, using it to identify the  
538 redox partnership between *PfJ2*, *PfPDI8* and *PfPDI11*(Figure 3). Double conditional *P.*  
539 *falciparum* mutants showed that *PfPDI8* is also an essential, ER-resident protein and  
540 allowed us to probe more deeply the relationship between *PfJ2* and *PfPDI8* (Figures 4-  
541 6). *PfJ2* likely acts as a reductase, and previous *in vitro* characterization of *PfPDI8*  
542 revealed that it behaves like a classical PDI, capable of both forming and reducing  
543 disulfide bonds (Cunnea et al., 2003; Mahajan et al., 2006; Mouray et al., 2007; Oka et  
544 al., 2013; Ushioda et al., 2008).The propensity for *PfPDI8* to use its Trx domains either  
545 for oxidation of cysteines or reduction of disulfides likely depends on the oxidation state  
546 of its own active site (i.e. reduced *PfPDI8* can act as a reductase). One explanation for  
547 the redox partnership between *PfJ2* and *PfPDI8* is that *PfJ2* primes *PfPDI8* to act as a  
548 reductase for some or all of the numerous substrates we visualized using DVSF (Figure  
549 5D). Consistent with this hypothesis, immunoprecipitation experiments showed that  
550 *PfPDI8*+substrates pull down with *PfJ2* (Figure 6C). We also found that *PfJ2* and *PfPDI8*  
551 both interact with the Hsp70 *PfBiP*, and detection of that interaction increases for *PfPDI8*  
552 when it is trapped to its substrates (Figure 6D, E). These data suggest a model in which  
553 *PfJ2*, *PfPDI8*, and *PfBiP* cooperate to ensure substrates in the ER correctly navigate the  
554 oxidative folding process to achieve their native states (Figure 8).

555  
556 We also identified *PfPDI11* as a redox substrate of *PfJ2* (Figure 3). Our data demonstrate  
557 that *PfPDI11* retains the ability to form mixed disulfides with client proteins despite the  
558 unusual CXXS Trx-domain active site (Figure 5, Supplementary Figures 6, 7). Typically,  
559 the second cysteine of the Trx-domain active site is used to resolve enzyme-substrate  
560 mixed disulfides (Hatahet & Ruddock, 2009). Therefore, the mechanisms used to resolve  
561 mixed disulfides between CXXS active sites and their substrates remains unclear, both  
562 in *P. falciparum* and other organisms. We propose that an ER-resident reductase such  
563 as *PfJ2* helps resolve mixed disulfides, which would explain why *PfJ2* and *PfPDI11* were  
564 found to be redox partners.

565  
566 Importantly, given the recent stagnation observed in malaria elimination efforts, which is  
567 coincident with increasing cases of antimalarial resistance, we not only identified two



568 proteins with essential functions; we further demonstrated that the redox partnerships of  
569 these proteins are sensitive to disruption by small molecule inhibition (Figure 7). 16F16  
570 is a covalent inhibitor that blocks Trx-domain cysteines (Hoffstrom et al., 2010; Kaplan et  
571 al., 2015). Such a compound, if specific for *P. falciparum*, could be expected to cripple  
572 oxidative folding in the ER and kill the parasite. Recently, interest in covalent inhibitors  
573 for treatment of human disease has renewed, with several covalent inhibitors approved  
574 for use by the United States Food and Drug Administration (Ghosh et al., 2019). One  
575 particular concern with covalent inhibitors is the fact that mutagenesis of the target  
576 residue would result in resistance, but mutagenesis of Trx-domain cysteines would lead  
577 to loss of function in and of itself, presumably making this type of resistance harder to  
578 evolve. Finally, given the disparity in activity observed for the PDI inhibitors against  
579 human cell lines and *P. falciparum*, enough diversity likely exists between these  
580 conserved proteins that *Plasmodium*-specific inhibitors could be developed  
581 (Supplementary Figure 10). Therefore, essential Trx-domain proteins in the parasite ER—  
582 like *PfJ2* and *PfPDI8*—represent a class of proteins and a pathway in the ER that is apt  
583 for antimalarial drug development.  
584

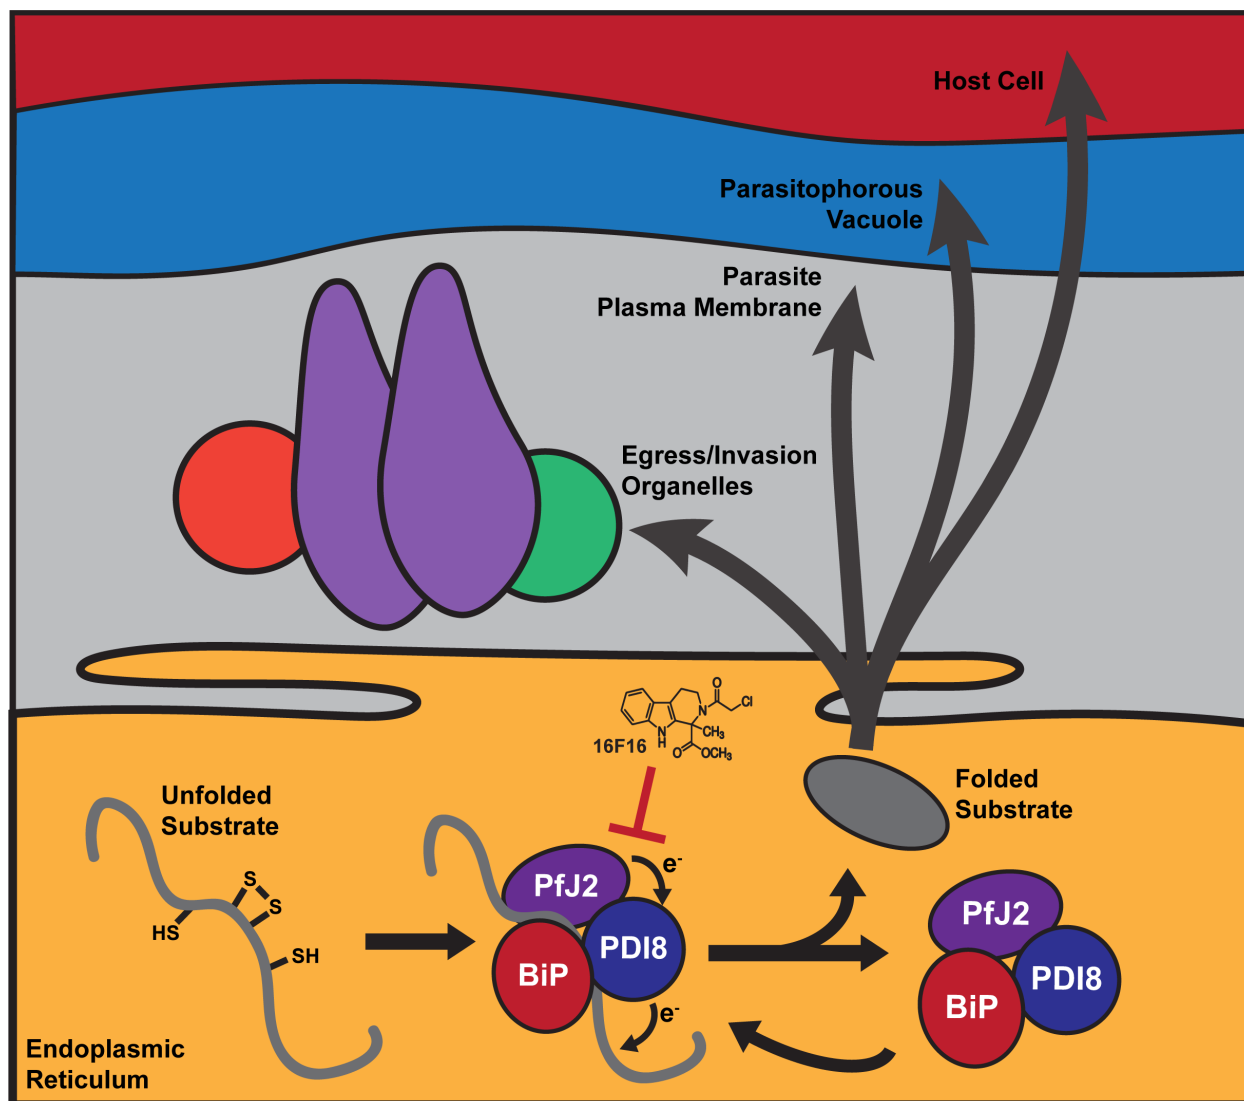

**Figure 8. Oxidative folding in the *P. falciparum* ER.** We propose that Trx-domain proteins like *PfJ2* and *PfPDI8* work with *PfBiP* to help nascent proteins, which perform essential functions within the ER and throughout the parasite secretory pathway, achieve their native states. The redox interactions between *PfJ2*, *PfPDI8*, and their substrates are sensitive to inhibition by small molecules like 16F16, which could be expected to disrupt oxidative folding and impair the parasite's ability to perform functions essential for survival and replication.

## Materials and Methods

### Construction of Plasmids

Parasite genomic DNA was isolate from 3D7 parasites using QIAamp DNA blood kit (QIAGEN). All constructs utilized in this study were confirmed by sequencing. Plasmids

599 were constructed using the Sequence and Ligation Independent Cloning (SLIC) method.  
600 Plasmids to express Cas9 and gRNAs were constructed using pUF1-Cas9 as previously  
601 described (Cobb et al., 2017; Ghorbal et al., 2014; Kudyba et al., 2018). All primers used  
602 in this study are listed in Supplemental Table 3. *pfpdi8* cDNA was prepared using TRIzol-  
603 extracted mRNA and reverse transcription with primer P20 (SuperScript III, Invitrogen).  
604 All restriction enzymes used in plasmid construction were purchased from New England  
605 Biolabs.

606  
607 To generate pMG74-PfJ2, approximately 500 bp of the sequence encoding the *PfJ2* C-  
608 terminus was amplified using primers P1 and P2, and approximately 500 bp from the *pfj2*  
609 3'UTR were amplified using P3 and P4. The two amplicons were joined together via PCR  
610 sewing using P1 and P4, then inserted into pMG74 (Ganesan et al., 2016) digested with  
611 *AflIII* and *AatII*. For expression of a *PfJ2* gRNA, oligos P31 and P32 were inserted into  
612 pUF1-Cas9.

613  
614 To generate pV5-glmS-PDI8, approximately 500 bp of the sequence encoding the *PfPDI8*  
615 C-terminus was amplified using primers P5 and P6. The 3x V5 tag was added to this  
616 amplicon via PCR sewing using a linearized plasmid encoding the 3xV5 sequence and  
617 primers P5 and P7. The *glmS* ribozyme sequence was amplified from pHA-*glmS*  
618 (Prommana et al., 2013) using P8 and P9, then added to the *PfPDI8* C-terminus+V5  
619 amplicon via PCR sewing using P5 and P9. The resulting amplicon was inserted into  
620 pHA-*glmS* that had been digested with *AfeI* and *NheI*, creating pPDI8-Cterm.  
621 Approximately 500 bp of the *pfpdi8* 3'UTR was amplified using P10 and P11, then inserted

622 into pPDI8-Cterm that had been digested with HindIII and NotI, creating pV5-glmS-PDI8.

623 For expression of a *PfPDI8* gRNA, oligos P33 and P34 were inserted into pUF1-Cas9.

624

625 To generate pV5-glmS-PDI11, approximately 500 bp of the sequence encoding the

626 *PfPDI11* C-terminus was amplified using primers P12 and P13. The 3x V5 tag was added

627 to this amplicon via PCR sewing using a linearized plasmid encoding the 3xV5 sequence

628 and primers P12 and P14. The glmS ribozyme sequence was amplified from pHA-glmS

629 (Prommana et al., 2013) using 15 and P16, then added to the *PfPDI8* C-terminus+V5

630 amplicon via PCR sewing using P12 and P16. The resulting amplicon was inserted into

631 pHA-glmS that had been digested with AfeI and NheI, creating pPDI11-Cterm.

632 Approximately 500 bp of the *pfpdi11* 3'UTR was amplified using P17 and P18, then

633 inserted into pPDI11-Cterm that had been digested with HindIII and NotI, creating pV5-

634 glmS-PDI11. For expression of a *PfPDI11* gRNA, oligos P35 and P36 were inserted into

635 pUF1-Cas9.

636

637 *PfPDI8* and *PfPDI11* overexpression was carried out by using CRISPR/Cas9 to insert the

638 open reading frame (ORF) of the tagged genes into the *pfhsp110c* locus. pUC57-Hsp110,

639 the repair plasmid targeting *pfhsp110*, includes the last 429 bp encoding the PfHsp110c

640 (PF3D7\_0708800) C-terminus, a 2A skip peptide sequence, sequences for various

641 peptide tags, then the first 400 bp from the *pfhsp110c* 3'UTR. This plasmid was

642 synthesized by GeneScript. For expression of a *PfHsp110c* gRNA, oligos P37 and P38

643 were inserted into pUF1-Cas9.

644

645 To generate pUC57-Hsp110-PDI8<sup>wt</sup>, the *Pf*PDI8 ORF was amplified from cDNA using  
646 P19 and P20. A sequence encoding the 3xV5 was attached to this amplicon via PCR  
647 sewing using a linearized plasmid encoding the tag and primers P19 and P21. The  
648 resulting amplicon was inserted into pUC57-Hsp110 digested with MfeI and SpeI.

649

650 To generate pUC57-Hsp110-PDI11<sup>wt</sup>, the *Pf*PDI11 ORF was amplified using P22 and  
651 P23. A sequence encoding the 3xV5 was attached to this amplicon via PCR sewing using  
652 a linearized plasmid encoding the tag and primers P22 and P24. The resulting amplicon  
653 was inserted into pUC57-Hsp110 digested with MfeI and SpeI.

654

655 To generate pUC57-Hsp110-PDI11<sup>mut</sup>, which required mutagenesis of the 2 Trx-domain  
656 active site, the *Pf*PDI11 ORF was amplified in 3 parts. Part 1 was amplified using P25  
657 and P26. Part 2 was amplified using P27 and P28. Part 3 was amplified using P29 and  
658 P30. Parts 1+2 were joined together using PCR sewing and primers P25 and P28. The  
659 resulting amplicon was attached to Part 3 using PCR sewing and primers P25 and P30.  
660 A sequence encoding the 3xV5 was attached to this amplicon via PCR sewing using a  
661 linearized plasmid encoding the tag and primers P25 and P24. The resulting amplicon  
662 was inserted into pUC57-Hsp110 digested with MfeI and SpeI.

663

## 664 **Parasite Culture and Transfection**

665 *P. falciparum* asexual parasites were cultured in RPMI 1640 medium supplemented with  
666 AlbuMAX I (Gibco) and transfected as described earlier (Drew et al., 2008; I. Russo et  
667 al., 2009).

668

669 To generate the *PfJ2<sup>apt</sup>* parasite line, RBCs were transfected with 20 µg pMG74-PfJ2  
670 (linearized prior to transfection using EcoRV) and 50 µg pUF1-Cas9-PfJ2, then fed to 3D7  
671 parasites. Drug pressure was applied 48 hours after transfection, selecting for integration  
672 using 0.5 µM aTc and 2.5 µg/mL Blasticidin. After parasites grew back up from  
673 transfection and were cloned using limiting dilution, clones were maintained in medium  
674 containing 10 nM aTc and 2.5 µg/mL Blasticidin. Unless started otherwise, all +/- aTc  
675 growth experiments were conducted in medium containing 10 nM aTc and 2.5 µg/mL  
676 Blasticidin or medium containing only 2.5 µg/mL Blasticidin.

677

678 To generate the *PfJ2<sup>apt</sup>-PDI8<sup>glms</sup>* parasite line, RBCs were transfected with 50 µg pV5-  
679 glmS-PDI8 and 50 µg pUF1-Cas9-PDI8, then fed to *PfJ2<sup>apt</sup>* parasites. Drug pressure was  
680 applied 48 hours after transfection, selecting with 0.5 µM aTc, 2.5 µg/mL Blasticidin, and  
681 1 µM Drug Selectable Marker 1 (DSM1) (Ghorbal et al., 2014). After parasites grew back  
682 up from transfection and were cloned using limiting dilution, clones were maintained in  
683 medium containing 50 nM aTc and 2.5 µg/mL Blasticidin. *PfJ2<sup>apt</sup>-PDI11<sup>glms</sup>* parasites were  
684 generated in the same manner, using 50 µg pV5-glmS-PDI11 and 50 µg pUF1-Cas9-  
685 PDI11.

686

687 To generate the *PfPDI8<sup>wt</sup>* overexpression parasite line, RBCs were transfected with 50  
688 µg pUC57-Hsp110-PDI8<sup>wt</sup> and 50 µg pUF1-Cas9-Hsp110, then fed to *PfJ2<sup>apt</sup>* parasites.  
689 Drug pressure was applied 48 hours after transfection, selecting with 0.5 µM aTc, 2.5  
690 µg/mL Blasticidin, and 1 µM Drug Selectable Marker 1 (DSM1) (Ghorbal et al., 2014).



691 After parasites grew back up from transfection and were cloned using limiting dilution,  
692 clones were maintained in medium containing 10 nM aTc and 2.5 µg/mL Blasticidin.  
693 *Pf*PD11<sup>wt</sup> and *Pf*PD11<sup>mut</sup> parasites were generated in the same manner, using pUC57-  
694 Hsp110-PD11<sup>wt</sup> and pUC57-Hsp110-PD11<sup>mut</sup>, respectively.

695

696 Parasite synchronization was carried out as described (Kudyba et al., 2019).

697

### 698 **Western Blotting**

699 Western blots were performed as previously described (Muralidharan et al., 2011). Briefly,  
700 ice-cold 0.04% saponin in 1x PBS was used to isolate parasites from host cells. Parasite  
701 pellets were subsequently solubilized in protein loading dye to which Beta-  
702 mercaptoethanol had been added (LI-COR Biosciences) and used for SDS-PAGE.  
703 Primary antibodies used in this study were rat-anti-HA 3F10 (Roche, 1:3000), mouse-  
704 anti-HA 6E2 (Cell Signaling Technology, 1:1000), rabbit-anti-HA 715500 (Thermofisher,  
705 1:100), mouse-anti-V5 TCM5 (eBioscience, 1:1000), rabbit-anti-V5 D3H8Q (Cell Signaling  
706 Technology, 1:1000), rabbit anti-*Pf*BiP MRA-1246 (BEI resources, 1:500), rabbit-anti-  
707 *Pf*EF1α (from D. Goldberg, 1:2000), and mouse-anti-*Pf*PMV (from D. Goldberg 1:400).  
708 Secondary antibodies used were IRDye 680CW goat-anti-rabbit IgG and IRDye 800CW  
709 goat-anti-mouse IgG (Li-COR Biosciences, 1:20,000). Membranes were imaged using  
710 the Odyssey Clx Li-COR infrared imaging system (Li-COR Biosciences). Images of  
711 membranes were processed using ImageStudio, the Odyssey Clx Li-COR infrared  
712 imaging system software (Li-COR Biosciences). Densitometry analysis of western blot  
713 signal was also performed using ImageStudio (Li-COR Biosciences).

714

## 715 **Microscopy and Image Analysis**

716 Parasites were fixed for IFA using 4% Paraformaldehyde and 0.03% glutaraldehyde, then  
717 permeabilized with 0.1% Triton-X100. Primary antibodies used were rat-anti-HA 3F10  
718 (Roche, 1:100), mouse-anti-HA 6E2 (Cell Signaling Technology, 1:100), mouse-anti-V5  
719 TCM5 (eBioscience, 1:100), rabbit-anti-V5 D3H8Q (Cell Signaling Technology, 1:100),  
720 and mouse-anti-*Pf*PMV (from D. Goldberg 1:1). Secondary antibodies used were Alexa  
721 Fluor 488 and Alexa Fluor 546 (Life Technologies, 1:100). Cells were mounted to slides  
722 using ProLong Diamond with DAPI (Invitrogen). Fixed and stained cells were imaged  
723 using a DeltaVision II microscope system with an Olympus IX-71 inverted microscope.  
724 Images were collected as a Z-stack and deconvolved using SoftWorx, then displayed as  
725 a maximum intensity projection. Images were processed using Adobe Photoshop, with  
726 adjustments made to brightness and contrast for display purposes.

727 For imaging of parasite cultures using light microscopy, aliquots of culture were smeared  
728 onto glass slides and field-stained using Hema3 Fixative and Solutions (Fisher  
729 Healthcare), which is comparable to Wright-Giemsa staining. Slides were imaged using  
730 a Nikon Eclipse E400 microscope with a Nikon DS-L1-5M imaging camera. To measure  
731 parasite size, images were taken and parasites measured using ImageJ (NIH).

## 732 **Growth Assays using Flow Cytometry**

733 Aliquots of parasites culture were incubated in 8  $\mu$ M Hoescht 33342 (Thermofisher  
734 Scientific) for 20 minutes at room temperature, then fluorescence was measured using a  
735 CytoFlex S (Beckman Coulter, Hialeah, Florida). Flow cytometry data were analyzed  
736 using FlowJo software (Treestar, Inc., Ashland, Oregon). For IC<sub>50</sub> experiments, data were

737 analyzed using the 4-parameter dose-response-curve function of Prism (GraphPad  
738 Software, Inc.).

739

#### 740 **Immunoprecipitation Assays**

741 Anti-HA immunoprecipitation (IP) assays were performed as previously described, using  
742 anti-HA magnetic beads (Pierce) (Fierro et al., 2020). Anti-V5 IP assays were performed  
743 in the same manner as with anti-HA, but anti-V5 magnetic beads were used according to  
744 manufacturer instructions (MBL International Corporation).

745

#### 746 **Mass Spectrometry and Data Analysis**

747 CoIP samples were sent to Emory University Integrated Proteomics Core and analyzed  
748 using a Fusion Orbitrap mass spectrometer, or to the proteomics core at the Fred  
749 Hutchinson Cancer Research Center, where samples were analyzed using an OrbiTrap  
750 Elite. Data were searched using Proteome Discoverer 2.2 with UP000001450  
751 *Plasmodium falciparum* (Uniprot Nov 2018) as the background database. The validation  
752 also included Sequest HT and Percolator to search for common contaminants. Results  
753 consisted of high confidence data with a 1% false discovery rate. Protein abundance was  
754 calculated by summing the total intensities (MS1 values) of all matched peptides for each  
755 selected protein, and normalizing by the total summed intensity of all matched peptides  
756 in the sample, as previously described (Boucher et al., 2018).

757

#### 758 **Identification of PfJ2 Redox Partners**

759 *PfJ2<sup>apt</sup>* parasites were incubated with 3 mM divinyl sulfone (DVSF, Fisher Scientific) in 1x  
760 PBS for 30 minutes at 37°C, then used for anti-HA immunoprecipitation as described  
761 above. Immunoprecipitated proteins were separated by SDS-PAGE. Polyacrylamide gel  
762 slices corresponding to the protein molecular weights of interest were excised and the  
763 peptides extracted by in-gel enzymatic digestion. The gel slices were dehydrated in 100%  
764 acetonitrile and dried using a speed vac. The proteins were then reduced by rehydrating  
765 the gel slices in 10mM dithiothreitol in 100mM ammonium bicarbonate solution, and  
766 alkylated in 50mM iodoacetamide in 100 mM ammonium bicarbonate solution. The gel  
767 slices were then washed in 50% acetonitrile in 50mM ammonium bicarbonate solution  
768 before being dehydrated and dried again using 100% acetonitrile and a speed vac.  
769 Proteins were then digested in-gel by rehydrating the gel slices in trypsin enzyme solution  
770 consisting of 6ng/μl trypsin (Promega) in 50mM ammonium bicarbonate solution.  
771 Digestion was performed at 37°C overnight. Peptides were extracted through stepwise  
772 incubations with 2% acetonitrile and 1% formic acid solution, 60% acetonitrile and 0.5%  
773 formic acid solution, and 100% acetonitrile solution. Supernatants were combined and  
774 dried in a speed vac before resuspension in 20 μl water with 0.1% formic acid.

775

776 LC-MS/MS analysis was performed using a 50 cm fused silica capillary (75 μm ID) packed  
777 with C18 (2 μm, Dr. Maisch GmbH), and heated to 50°C. Prior to loading the column,  
778 sample was loaded onto a 2 cm Acclaim PepMap 100 (Thermo Fisher Scientific) trap (75  
779 μm ID, C18 3 μm). For each sample injection, 5 μl of sample was loaded onto the trap  
780 using an Easy nLC-1000 (Thermo Fisher Scientific). Each sample was separated using  
781 the Easy nLC-1000 with a binary mobile phase gradient to elute the peptides. Mobile

782 phase A consisted of 0.1% formic acid in water, and mobile phase B consisted of 0.1%  
783 formic acid in acetonitrile. The gradient program consisted of three steps at a flow rate of  
784 0.3  $\mu$ L/min: (1) a linear gradient from 5% to 40% mobile phase B over two hours, (2) a 10  
785 minute column wash at 80% mobile phase B, and (3) column re-equilibration for 20  
786 minutes at 5% mobile phase B.

787

788 Mass spectra were acquired on a Fusion Lumos Tribrid (Thermo Fisher Scientific) mass  
789 spectrometer operated by data dependent acquisition (DDA) using a top 15 selection  
790 count. Precursor ion scans were performed at 120,000 resolution over a range from 375  
791 to 1375 m/z. DDA was performed with charge exclusion of 1 and greater than 8, with  
792 isotope exclusion, and dynamic exclusion set to 10 seconds. MS/MS was performed  
793 using an isolation window of 1.6 m/z for selection, normalized collision energy (NCE) of  
794 28, and higher energy collision induced dissociation (HCD). MS/MS spectra were  
795 acquired at 15000 resolution with an automatic gain control (AGC) target of 70,000 and  
796 maximum injection time of 50 ms.

797

798 Mass spectra (.raw files) were converted to mzML format using MSConvert (version  
799 3.0.1908) (Adusumilli & Mallick, 2017) and peptide sequences were identified using  
800 database searching with Comet (Eng et al., 2013) (version 2016.01 rev 2). Spectra were  
801 searched against a subset of *P. falciparum* secretory proteins, common laboratory  
802 contaminants, and an equal number of randomized decoy sequences (4386 total protein  
803 sequence). Comet parameters included variable modifications of +57.021464 Da or  
804 +118.0089 Da on cysteine and a variable modification of +15.994915 Da on methionine

805 or tryptophan. Precursor mass tolerance was set to 25 ppm and a `fragment_bin_tolerance`  
806 of 0.02 and `fragment_bin_offset` of 0 were used. Full-tryptic enzymatic cleavage was set,  
807 allowing for up to 3 missed cleavages. Peptide spectrum matches (PSM) were analyzed  
808 using the Trans-Proteomic Pipeline (Deutsch et al., 2015) (TPP, version 5.0.0 Typhoon),  
809 to assign peptide and protein probabilities using PeptideProphet (Keller et al., 2002) and  
810 iProphet (Shteynberg et al., 2011), respectively. Spectral counts and precursor ion  
811 intensities were exported for each non-redundant PSM at a 1% false discovery rate  
812 (FDR). Protein inference was performed with ProteinProphet (Nesvizhskii et al., 2003),  
813 using a 1% FDR. The mass spectrometry proteomics data have been deposited to the  
814 ProteomeXchange Consortium via the PRIDE partner repository (Vizcaino et al., n.d.)  
815 with dataset identifier PXD019100.

816

## 817 **Acknowledgements**

818 We thank Dan Goldberg for antibodies against *PfPMV* and *PfEF1 $\alpha$* ; Anat Florentin for  
819 comments on the manuscript; Julie Nelson at the CTEGD Cytometry Shared Resource  
820 Laboratory for help with flow cytometry and analysis; and Muthugapatti Kandasamy at the  
821 Biomedical Microscopy Core at the University of Georgia for help with microscopy. We  
822 acknowledge assistance of the Proteomics Resource at Fred Hutchinson Cancer  
823 Research Center and the Emory University Integrated Proteomics Core for mass  
824 spectrometry and data analysis. This work was supported by awards from the ARCS  
825 Foundation to D.W.C., and the US National Institutes of Health (R01AI130139) to V.M.  
826 and (T32AI060546) to D.W.C. We are grateful for support from the National Institutes of  
827 Health from the Office of The Director, under award number S10OD026936, and by



828 National Institute of General Medical Sciences under award numbers R01GM087221 and  
829 P41GM103533.

830

### 831 **Competing Interests**

832 The authors declare no competing interests.

833

### 834 **References**

835 Absalon, S., Blomqvist, K., Rudlaff, R. M., DeLano, T. J., Pollastri, M. P., & Dvorin, J. D. (2018).

836 Calcium-Dependent Protein Kinase 5 Is Required for Release of Egress-Specific Organelles

837 in *Plasmodium falciparum*. *MBio*, *9*(1), e00130-18. [https://doi.org/10.1128/mBio.00130-](https://doi.org/10.1128/mBio.00130-18)

838 18

839 Adusumilli, R., & Mallick, P. (2017). Data Conversion with ProteoWizard msConvert. In L. Comai,

840 J. E. Katz, & P. Mallick (Eds.), *Proteomics: Methods and Protocols* (pp. 339–368). Springer

841 New York. [https://doi.org/10.1007/978-1-4939-6747-6\\_23](https://doi.org/10.1007/978-1-4939-6747-6_23)

842 Allan, K. M., Loberg, M. A., Chepngeno, J., Hurtig, J. E., Tripathi, S., Kang, M. G., Allotey, J. K.,

843 Widdershins, A. H., Pilat, J. M., Sizek, H. J., Murphy, W. J., Naticchia, M. R., David, J. B.,

844 Morano, K. A., & West, J. D. (2016). Trapping redox partnerships in oxidant-sensitive

845 proteins with a small, thiol-reactive cross-linker. *Free Radical Biology & Medicine*, *101*,

846 356–366. PubMed. <https://doi.org/10.1016/j.freeradbiomed.2016.10.506>

847 Almanza, A., Carlesso, A., Chintha, C., Creedican, S., Doultinos, D., Leuzzi, B., Luís, A., McCarthy,

848 N., Montibeller, L., More, S., Papaioannou, A., Püschel, F., Sassano, M. L., Skoko, J.,

849 Agostinis, P., de Bellerocche, J., Eriksson, L. A., Fulda, S., Gorman, A. M., ... Samali, A. (2019).

850 Endoplasmic reticulum stress signalling—From basic mechanisms to clinical applications.  
851 *The FEBS Journal*, 286(2), 241–278. <https://doi.org/10.1111/febs.14608>

852 Amberg-Johnson, K., Hari, S. B., Ganesan, S. M., Lorenzi, H. A., Sauer, R. T., Niles, J. C., & Yeh, E.  
853 (2017). Small molecule inhibition of apicomplexan FtsH1 disrupts plastid biogenesis in  
854 human pathogens. *ELife*, 6, e29865. <https://doi.org/10.7554/eLife.29865>

855 Anelli, T. (2003). Thiol-mediated protein retention in the endoplasmic reticulum: The role of  
856 ERp44. *The EMBO Journal*, 22(19), 5015–5022. <https://doi.org/10.1093/emboj/cdg491>

857 Araki, K., Ushioda, R., Kusano, H., Tanaka, R., Hatta, T., Fukui, K., Nagata, K., & Natsume, T. (2017).  
858 A crosslinker-based identification of redox relay targets. *Analytical Biochemistry*, 520, 22–  
859 26. <https://doi.org/10.1016/j.ab.2016.12.025>

860 Batinovic, S., McHugh, E., Chisholm, S. A., Matthews, K., Liu, B., Dumont, L., Charnaud, S. C.,  
861 Schneider, M. P., Gilson, P. R., de Koning-Ward, T. F., Dixon, M. W. A., & Tilley, L. (2017).  
862 An exported protein-interacting complex involved in the trafficking of virulence  
863 determinants in Plasmodium-infected erythrocytes. *Nature Communications*, 8(1),  
864 16044. <https://doi.org/10.1038/ncomms16044>

865 Botha, M., Pesce, E.-R., & Blatch, G. L. (2007). The Hsp40 proteins of Plasmodium falciparum and  
866 other apicomplexa: Regulating chaperone power in the parasite and the host. *The*  
867 *International Journal of Biochemistry & Cell Biology*, 39(10), 1781–1803.  
868 <https://doi.org/10.1016/j.biocel.2007.02.011>

869 Boucher, M. J., Ghosh, S., Zhang, L., Lal, A., Jang, S. W., Ju, A., Zhang, S., Wang, X., Ralph, S. A.,  
870 Zou, J., Elias, J. E., & Yeh, E. (2018). Integrative proteomics and bioinformatic prediction

- 871 enable a high-confidence apicoplast proteome in malaria parasites. *PLOS Biology*, 16(9),  
872 e2005895. <https://doi.org/10.1371/journal.pbio.2005895>
- 873 Bowman, J. D., Merino, E. F., Brooks, C. F., Striepen, B., Carlier, P. R., & Cassera, M. B. (2014).  
874 Antiapicoplast and Gametocytocidal Screening To Identify the Mechanisms of Action of  
875 Compounds within the Malaria Box. *Antimicrobial Agents and Chemotherapy*, 58(2), 811–  
876 819. <https://doi.org/10.1128/AAC.01500-13>
- 877 Bridgford, J. L., Xie, S. C., Cobbold, S. A., Pasaje, C. F. A., Herrmann, S., Yang, T., Gillett, D. L., Dick,  
878 L. R., Ralph, S. A., Dogovski, C., Spillman, N. J., & Tilley, L. (2018). Artemisinin kills malaria  
879 parasites by damaging proteins and inhibiting the proteasome. *Nature Communications*,  
880 9(1), 3801. <https://doi.org/10.1038/s41467-018-06221-1>
- 881 Cobb, D. W., Florentin, A., Fierro, M. A., Krakowiak, M., Moore, J. M., & Muralidharan, V. (2017).  
882 The Exported Chaperone PfHsp70x Is Dispensable for the Plasmodium falciparum  
883 Intraerythrocytic Life Cycle. *MSphere*, 2(5), e00363-17. PubMed.  
884 <https://doi.org/10.1128/mSphere.00363-17>
- 885 Cowman, A. F., Healer, J., Marapana, D., & Marsh, K. (2016). Malaria: Biology and Disease. *Cell*,  
886 167(3), 610–624. <https://doi.org/10.1016/j.cell.2016.07.055>
- 887 Cunnea, P. M., Miranda-Vizueté, A., Bertoli, G., Simmen, T., Damdimopoulos, A. E., Hermann, S.,  
888 Leinonen, S., Huikko, M. P., Gustafsson, J.-Å., Sitia, R., & Spyrou, G. (2003). ERdj5, an  
889 Endoplasmic Reticulum (ER)-resident Protein Containing DnaJ and Thioredoxin Domains,  
890 Is Expressed in Secretory Cells or following ER Stress. *Journal of Biological Chemistry*,  
891 278(2), 1059–1066. <https://doi.org/10.1074/jbc.M206995200>

- 892 Das, S., Hertrich, N., Perrin, A. J., Withers-Martinez, C., Collins, C. R., Jones, M. L., Watermeyer, J.  
893 M., Fobes, E. T., Martin, S. R., Saibil, H. R., Wright, G. J., Treeck, M., Epp, C., & Blackman,  
894 M. J. (2015). Processing of Plasmodium falciparum Merozoite Surface Protein MSP1  
895 Activates a Spectrin-Binding Function Enabling Parasite Egress from RBCs. *Cell Host &*  
896 *Microbe*, 18(4), 433–444. PubMed. <https://doi.org/10.1016/j.chom.2015.09.007>
- 897 Deutsch, E. W., Mendoza, L., Shteynberg, D., Slagel, J., Sun, Z., & Moritz, R. L. (2015). Trans-  
898 Proteomic Pipeline, a standardized data processing pipeline for large-scale reproducible  
899 proteomics informatics. *PROTEOMICS - Clinical Applications*, 9(7–8), 745–754.  
900 <https://doi.org/10.1002/prca.201400164>
- 901 Drew, M. E., Banerjee, R., Uffman, E. W., Gilbertson, S., Rosenthal, P. J., & Goldberg, D. E. (2008).  
902 Plasmodium Food Vacuole Plasmepsins Are Activated by Falcipains. *Journal of Biological*  
903 *Chemistry*, 283(19), 12870–12876. <https://doi.org/10.1074/jbc.M708949200>
- 904 Eng, J. K., Jahan, T. A., & Hoopmann, M. R. (2013). Comet: An open-source MS/MS sequence  
905 database search tool. *PROTEOMICS*, 13(1), 22–24.  
906 <https://doi.org/10.1002/pmic.201200439>
- 907 Favuzza, P., de Lera Ruiz, M., Thompson, J. K., Triglia, T., Ngo, A., Steel, R. W. J., Vavrek, M.,  
908 Christensen, J., Healer, J., Boyce, C., Guo, Z., Hu, M., Khan, T., Murgolo, N., Zhao, L.,  
909 Penington, J. S., Reaksudsan, K., Jarman, K., Dietrich, M. H., ... Cowman, A. F. (2020). Dual  
910 Plasmepsin-Targeting Antimalarial Agents Disrupt Multiple Stages of the Malaria Parasite  
911 Life Cycle. *Cell Host & Microbe*, S193131282030113X.  
912 <https://doi.org/10.1016/j.chom.2020.02.005>

- 913 Fierro, M. A., Asady, B., Brooks, C. F., Cobb, D. W., Villegas, A., Moreno, S. N. J., & Muralidharan,  
914 V. (2020). An Endoplasmic Reticulum CREC Family Protein Regulates the Egress Proteolytic  
915 Cascade in Malaria Parasites. *MBio*, 11(1), e03078-19, /mbio/11/1/mBio.03078-19.atom.  
916 <https://doi.org/10.1128/mBio.03078-19>
- 917 Florentin, A., Stephens, D. R., Brooks, C. F., Baptista, R. P., & Muralidharan, V. (2019). *The Clp*  
918 *System in Malaria Parasites Degrades Essential Substrates to Regulate Plastid Biogenesis*  
919 [Preprint]. Microbiology. <https://doi.org/10.1101/718452>
- 920 Fomenko, D. E., & Gladyshev, V. N. (2009). CxxS: Fold-independent redox motif revealed by  
921 genome-wide searches for thiol/disulfide oxidoreductase function. *Protein Science*,  
922 11(10), 2285–2296. <https://doi.org/10.1110/ps.0218302>
- 923 Galligan, J. J., & Petersen, D. R. (2012). The human protein disulfide isomerase gene family.  
924 *Human Genomics*, 6(1), 6. <https://doi.org/10.1186/1479-7364-6-6>
- 925 Ganesan, S. M., Falla, A., Goldfless, S. J., Nasamu, A. S., & Niles, J. C. (2016). Synthetic RNA–  
926 protein modules integrated with native translation mechanisms to control gene  
927 expression in malaria parasites. *Nature Communications*, 7(1), 10727.  
928 <https://doi.org/10.1038/ncomms10727>
- 929 Ghorbal, M., Gorman, M., Macpherson, C. R., Martins, R. M., Scherf, A., & Lopez-Rubio, J.-J.  
930 (2014). Genome editing in the human malaria parasite *Plasmodium falciparum* using the  
931 CRISPR-Cas9 system. *Nature Biotechnology*, 32(8), 819–821.  
932 <https://doi.org/10.1038/nbt.2925>
- 933 Ghosh, A. K., Samanta, I., Mondal, A., & Liu, W. R. (2019). Covalent Inhibition in Drug Discovery.  
934 *ChemMedChem*, 14(9), 889–906. PubMed. <https://doi.org/10.1002/cmdc.201900107>

- 935 Harbut, M. B., Patel, B. A., Yeung, B. K. S., McNamara, C. W., Bright, A. T., Ballard, J., Supek, F.,  
936 Golde, T. E., Winzeler, E. A., Diagana, T. T., & Greenbaum, D. C. (2012). Targeting the ERAD  
937 pathway via inhibition of signal peptide peptidase for antiparasitic therapeutic design.  
938 *Proceedings of the National Academy of Sciences*, *109*(52), 21486–21491.  
939 <https://doi.org/10.1073/pnas.1216016110>
- 940 Hatahet, F., & Ruddock, L. W. (2009). Protein Disulfide Isomerase: A Critical Evaluation of Its  
941 Function in Disulfide Bond Formation. *Antioxidants & Redox Signaling*, *11*(11), 2807–  
942 2850. <https://doi.org/10.1089/ars.2009.2466>
- 943 Hiller, N. L. (2004). A Host-Targeting Signal in Virulence Proteins Reveals a Secretome in Malarial  
944 Infection. *Science*, *306*(5703), 1934–1937. <https://doi.org/10.1126/science.1102737>
- 945 Hodder, A. N., Sleeb, B. E., Czabotar, P. E., Gazdik, M., Xu, Y., O'Neill, M. T., Lopaticki, S., Nebl,  
946 T., Triglia, T., Smith, B. J., Lowes, K., Boddey, J. A., & Cowman, A. F. (2015). Structural basis  
947 for plasmepsin V inhibition that blocks export of malaria proteins to human erythrocytes.  
948 *Nature Structural & Molecular Biology*, *22*(8), 590–596.  
949 <https://doi.org/10.1038/nsmb.3061>
- 950 Hoffstrom, B. G., Kaplan, A., Letso, R., Schmid, R. S., Turmel, G. J., Lo, D. C., & Stockwell, B. R.  
951 (2010). Inhibitors of protein disulfide isomerase suppress apoptosis induced by misfolded  
952 proteins. *Nature Chemical Biology*, *6*(12), 900–906.  
953 <https://doi.org/10.1038/nchembio.467>
- 954 Ito, D., Schureck, M. A., & Desai, S. A. (2017). An essential dual-function complex mediates  
955 erythrocyte invasion and channel-mediated nutrient uptake in malaria parasites. *ELife*, *6*,  
956 e23485. <https://doi.org/10.7554/eLife.23485>



- 957 Kaplan, A., Gaschler, M. M., Dunn, D. E., Colligan, R., Brown, L. M., Palmer, A. G., Lo, D. C., &  
958 Stockwell, B. R. (2015). Small molecule-induced oxidation of protein disulfide isomerase  
959 is neuroprotective. *Proceedings of the National Academy of Sciences*, *112*(17), E2245–  
960 E2252. <https://doi.org/10.1073/pnas.1500439112>
- 961 Keller, A., Nesvizhskii, A. I., Kolker, E., & Aebersold, R. (2002). Empirical Statistical Model To  
962 Estimate the Accuracy of Peptide Identifications Made by MS/MS and Database Search.  
963 *Analytical Chemistry*, *74*(20), 5383–5392. <https://doi.org/10.1021/ac025747h>
- 964 Kudyba, H. M., Cobb, D. W., Fierro, M. A., Florentin, A., Ljolje, D., Singh, B., Lucchi, N. W., &  
965 Muralidharan, V. (2019). The endoplasmic reticulum chaperone PfGRP170 is essential for  
966 asexual development and is linked to stress response in malaria parasites. *Cellular*  
967 *Microbiology*, *21*(9). <https://doi.org/10.1111/cmi.13042>
- 968 Kudyba, H. M., Cobb, D. W., Florentin, A., Krakowiak, M., & Muralidharan, V. (2018). CRISPR/Cas9  
969 Gene Editing to Make Conditional Mutants of Human Malaria Parasite *P. falciparum*.  
970 *Journal of Visualized Experiments: JoVE*, *139*, 57747. PubMed.  
971 <https://doi.org/10.3791/57747>
- 972 Külzer, S., Gehde, N., & Przyborski, J. M. (2009). Return to sender: Use of Plasmodium ER retrieval  
973 sequences to study protein transport in the infected erythrocyte and predict putative ER  
974 protein families. *Parasitology Research*, *104*(6), 1535–1541.  
975 <https://doi.org/10.1007/s00436-009-1397-x>
- 976 LaMonte, G. M., Rocamora, F., Marapana, D. S., Gnädig, N. F., Otilie, S., Luth, M. R., Worgall, T.  
977 S., Goldgof, G. M., Mohunlal, R., Santha Kumar, T. R., Thompson, J. K., Vigil, E., Yang, J.,  
978 Hutson, D., Johnson, T., Huang, J., Williams, R. M., Zou, B. Y., Cheung, A. L., ... Winzeler, E.

- 979 A. (2020). Pan-active imidazolopiperazine antimalarials target the Plasmodium falciparum  
980 intracellular secretory pathway. *Nature Communications*, *11*(1), 1780.  
981 <https://doi.org/10.1038/s41467-020-15440-4>
- 982 Mahajan, B., Noiva, R., Yadava, A., Zheng, H., Majam, V., Mohan, K. V. K., Moch, J. K., Haynes, J.  
983 D., Nakhasi, H., & Kumar, S. (2006). Protein disulfide isomerase assisted protein folding in  
984 malaria parasites. *International Journal for Parasitology*, *36*(9), 1037–1048.  
985 <https://doi.org/10.1016/j.ijpara.2006.04.012>
- 986 Marti, M. (2004). Targeting Malaria Virulence and Remodeling Proteins to the Host Erythrocyte.  
987 *Science*, *306*(5703), 1930–1933. <https://doi.org/10.1126/science.1102452>
- 988 Moura, P. A., Dame, J. B., & Fidock, D. A. (2009). Role of Plasmodium falciparum Digestive Vacuole  
989 Plasmepsins in the Specificity and Antimalarial Mode of Action of Cysteine and Aspartic  
990 Protease Inhibitors. *Antimicrobial Agents and Chemotherapy*, *53*(12), 4968–4978.  
991 <https://doi.org/10.1128/AAC.00882-09>
- 992 Mouray, E., Moutiez, M., Girault, S., Sergheraert, C., Florent, I., & Grellier, P. (2007). Biochemical  
993 properties and cellular localization of Plasmodium falciparum protein disulfide isomerase.  
994 *Biochimie*, *89*(3), 337–346. <https://doi.org/10.1016/j.biochi.2006.11.001>
- 995 Muralidharan, V., Oksman, A., Iwamoto, M., Wandless, T. J., & Goldberg, D. E. (2011). Asparagine  
996 repeat function in a Plasmodium falciparum protein assessed via a regulatable fluorescent  
997 affinity tag. *Proceedings of the National Academy of Sciences*, *108*(11), 4411–4416.  
998 <https://doi.org/10.1073/pnas.1018449108>
- 999 Nasamu, A. S., Glushakova, S., Russo, I., Vaupel, B., Oksman, A., Kim, A. S., Fremont, D. H., Tolia,  
1000 N., Beck, J. R., Meyers, M. J., Niles, J. C., Zimmerberg, J., & Goldberg, D. E. (2017).

1001 Plasmepsins IX and X are essential and druggable mediators of malaria parasite egress  
1002 and invasion. *Science*, 358(6362), 518–522. <https://doi.org/10.1126/science.aan1478>

1003 Naticchia, M. R., Brown, H. A., Garcia, F. J., Lamade, A. M., Justice, S. L., Herrin, R. P., Morano, K.  
1004 A., & West, J. D. (2013). Bifunctional electrophiles cross-link thioredoxins with redox relay  
1005 partners in cells. *Chemical Research in Toxicology*, 26(3), 490–497. PubMed.  
1006 <https://doi.org/10.1021/tx4000123>

1007 Nesvizhskii, A. I., Keller, A., Kolker, E., & Aebersold, R. (2003). A Statistical Model for Identifying  
1008 Proteins by Tandem Mass Spectrometry. *Analytical Chemistry*, 75(17), 4646–4658.  
1009 <https://doi.org/10.1021/ac0341261>

1010 Oka, O. B. V., Pringle, M. A., Schopp, I. M., Braakman, I., & Bulleid, N. J. (2013). ERdj5 Is the ER  
1011 Reductase that Catalyzes the Removal of Non-Native Disulfides and Correct Folding of the  
1012 LDL Receptor. *Molecular Cell*, 50(6), 793–804.  
1013 <https://doi.org/10.1016/j.molcel.2013.05.014>

1014 Park, S.-W., Zhen, G., Verhaeghe, C., Nakagami, Y., Nguyenvu, L. T., Barczak, A. J., Killeen, N., &  
1015 Erle, D. J. (2009). The protein disulfide isomerase AGR2 is essential for production of  
1016 intestinal mucus. *Proceedings of the National Academy of Sciences*, 106(17), 6950–6955.  
1017 <https://doi.org/10.1073/pnas.0808722106>

1018 Pino, P., Caldelari, R., Mukherjee, B., Vahokoski, J., Klages, N., Maco, B., Collins, C. R., Blackman,  
1019 M. J., Kursula, I., Heussler, V., Brochet, M., & Soldati-Favre, D. (2017). A multistage  
1020 antimalarial targets the plasmepsins IX and X essential for invasion and egress. *Science*,  
1021 358(6362), 522–528. <https://doi.org/10.1126/science.aaf8675>

- 1022 Prommana, P., Uthaipibull, C., Wongsombat, C., Kamchonwongpaisan, S., Yuthavong, Y.,  
1023 Knuepfer, E., Holder, A. A., & Shaw, P. J. (2013). Inducible Knockdown of Plasmodium  
1024 Gene Expression Using the glmS Ribozyme. *PLoS ONE*, 8(8), e73783.  
1025 <https://doi.org/10.1371/journal.pone.0073783>
- 1026 Richard, D., Kats, L. M., Langer, C., Black, C. G., Mitri, K., Boddey, J. A., Cowman, A. F., & Coppel,  
1027 R. L. (2009). Identification of Rhoptry Trafficking Determinants and Evidence for a Novel  
1028 Sorting Mechanism in the Malaria Parasite Plasmodium falciparum. *PLoS Pathogens*, 5(3),  
1029 e1000328. <https://doi.org/10.1371/journal.ppat.1000328>
- 1030 Russo, I., Oksman, A., Vaupel, B., & Goldberg, D. E. (2009). A calpain unique to alveolates is  
1031 essential in Plasmodium falciparum and its knockdown reveals an involvement in pre-S-  
1032 phase development. *Proceedings of the National Academy of Sciences*, 106(5), 1554–  
1033 1559. <https://doi.org/10.1073/pnas.0806926106>
- 1034 Russo, Ilaria, Babbitt, S., Muralidharan, V., Butler, T., Oksman, A., & Goldberg, D. E. (2010).  
1035 Plasmepsin V licenses Plasmodium proteins for export into the host erythrocyte. *Nature*,  
1036 463(7281), 632–636. <https://doi.org/10.1038/nature08726>
- 1037 Sherling, E. S., Knuepfer, E., Brzostowski, J. A., Miller, L. H., Blackman, M. J., & Ooij, C. van. (2017).  
1038 The Plasmodium falciparum rhoptry protein RhopH3 plays essential roles in host cell  
1039 invasion and nutrient uptake. *ELife*, 6, e23239. <https://doi.org/10.7554/eLife.23239>
- 1040 Shteynberg, D., Deutsch, E. W., Lam, H., Eng, J. K., Sun, Z., Tasman, N., Mendoza, L., Moritz, R. L.,  
1041 Aebersold, R., & Nesvizhskii, A. I. (2011). iProphet: Multi-level Integrative Analysis of  
1042 Shotgun Proteomic Data Improves Peptide and Protein Identification Rates and Error

- 1043 Estimates. *Molecular & Cellular Proteomics*, 10(12), M111.007690.
- 1044 <https://doi.org/10.1074/mcp.M111.007690>
- 1045 Ushioda, R., Hoseki, J., Araki, K., Jansen, G., Thomas, D. Y., & Nagata, K. (2008). ERdj5 Is Required
- 1046 as a Disulfide Reductase for Degradation of Misfolded Proteins in the ER. *Science*,
- 1047 321(5888), 569–572. <https://doi.org/10.1126/science.1159293>
- 1048 Vatolin, S., Phillips, J. G., Jha, B. K., Govindgari, S., Hu, J., Grabowski, D., Parker, Y., Lindner, D. J.,
- 1049 Zhong, F., Distelhorst, C. W., Smith, M. R., Cotta, C., Xu, Y., Chilakala, S., Kuang, R. R., Tall,
- 1050 S., & Reu, F. J. (2016). Novel Protein Disulfide Isomerase Inhibitor with Anticancer Activity
- 1051 in Multiple Myeloma. *Cancer Research*, 76(11), 3340–3350.
- 1052 <https://doi.org/10.1158/0008-5472.CAN-15-3099>
- 1053 Vizcaino, J. A., Csordas, A., Griss, J., Lavidas, I., Mayer, G., Perez-Riverol, Y., Reisinger, F., Ternent,
- 1054 T., Xu, Q.-W., Wang, R., & Hermjakob, H. (n.d.). *2016 update of the PRIDE database and*
- 1055 *its related tools*. 1.
- 1056 World Health Organization, C. (2019). *World Malaria Report 2019*. 232.
- 1057 Xu, S., Butkevich, A. N., Yamada, R., Zhou, Y., Debnath, B., Duncan, R., Zandi, E., Petasis, N. A., &
- 1058 Neamati, N. (2012). Discovery of an orally active small-molecule irreversible inhibitor of
- 1059 protein disulfide isomerase for ovarian cancer treatment. *Proceedings of the National*
- 1060 *Academy of Sciences*, 109(40), 16348–16353. <https://doi.org/10.1073/pnas.1205226109>
- 1061 Zhang, M., Gallego-Delgado, J., Fernandez-Arias, C., Waters, N. C., Rodriguez, A., Tsuji, M., Wek,
- 1062 R. C., Nussenzweig, V., & Sullivan, W. J. (2017). Inhibiting the Plasmodium eIF2 $\alpha$  Kinase
- 1063 PK4 Prevents Artemisinin-Induced Latency. *Cell Host & Microbe*, 22(6), 766-776.e4.
- 1064 <https://doi.org/10.1016/j.chom.2017.11.005>

1065 Zhang, M., Wang, C., Otto, T. D., Oberstaller, J., Liao, X., Adapa, S. R., Udenze, K., Bronner, I. F.,  
1066 Casandra, D., Mayho, M., Brown, J., Li, S., Swanson, J., Rayner, J. C., Jiang, R. H. Y., &  
1067 Adams, J. H. (2018). Uncovering the essential genes of the human malaria parasite  
1068 *Plasmodium falciparum* by saturation mutagenesis. *Science*, 360(6388), eaap7847.  
1069 <https://doi.org/10.1126/science.aap7847>

1070

## 1071 Competing Interests

1072 The authors declare no competing interests.

1073

## 1074 Supplementary Figures

1075

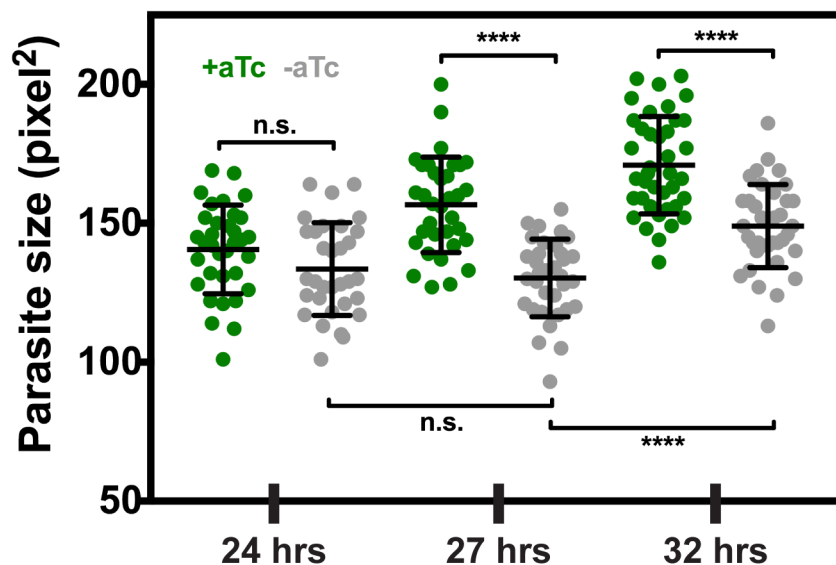

1076

1077 **Supplementary Figure 1. Parasite development is slowed during PfJ2 knockdown.**

1078 *PfJ2<sup>apt</sup>* parasites were tightly synchronized (0-3 hours) to the ring stage, then split into  
1079 either +aTc (10 nM) or -aTc medium. Smears were made and field-stained at various  
1080 time points throughout the asexual lifecycle. Stained slides were imaged and parasite  
1081 size was measured. Unpaired t-test, \*\*\*\* indicates  $p \leq 0.0001$ . Representative experiment  
1082 of 3 biological replicates shown.

1083



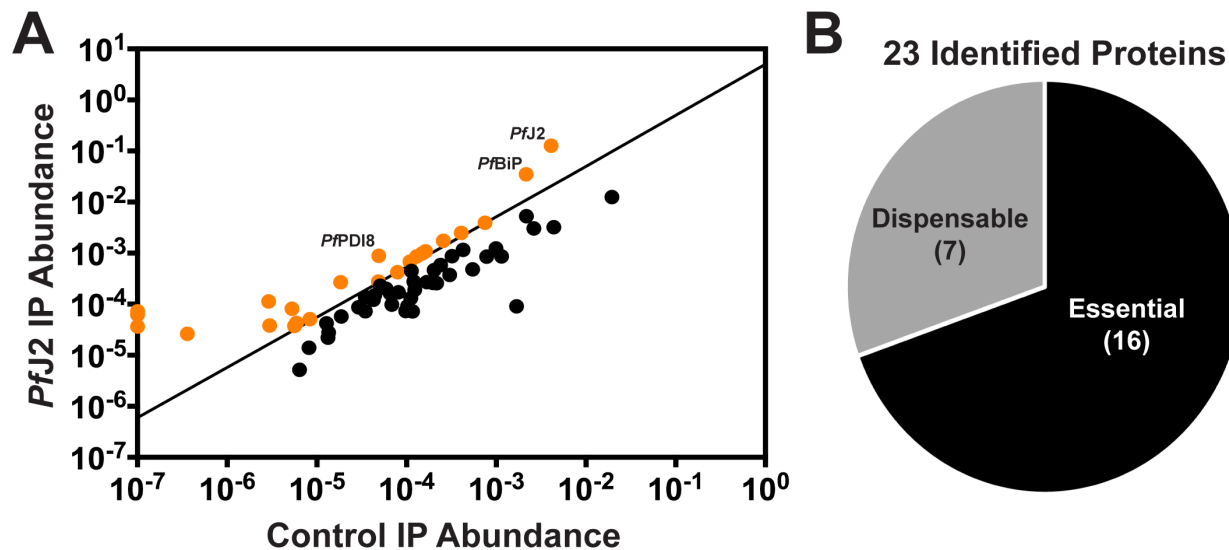

1084  
1085  
1086  
1087  
1088  
1089  
1090  
1091  
1092  
1093  
1094  
1095  
1096  
1097  
1098  
1099

**Supplementary Figure 2. *PfJ2* interacts with other essential chaperones, proteins in the secretory pathway. A)** *PfJ2* was immunoprecipitated from *PfJ2*<sup>apt</sup> parasites using anti-HA antibody, and co-immunoprecipitated proteins were identified by tandem mass spectrometry analysis. Control, parental parasites were also used for immunoprecipitation and analyzed in the same manner. Each colIP experiment was performed in triplicate, and the abundance of each identified protein was calculated as previously described in Boucher *et al.* Candidate proteins of interest were further identified as those in the secretory pathway (predicted to contain a signal peptide and/or transmembrane domains) and those which were present in all three *PfJ2*<sup>apt</sup> replicates and demonstrated a 5-fold enrichment compared to control experiments (shown in orange). **B)** The 23 proteins meeting our strict criteria were assessed against the piggyBac mutagenesis screen performed by Zhang, Wang *et al.*, and 16 were predicted to have essential functions in the *P. falciparum* asexual stages.

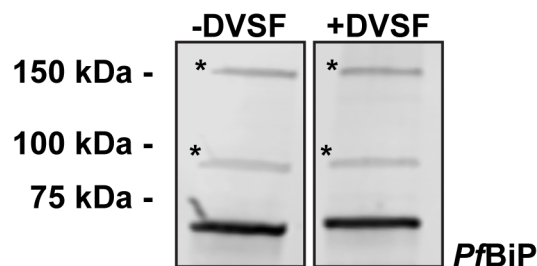

1100  
1101  
1102  
1103  
1104  
1105  
1106

**Supplementary Figure 3. *PfBiP* SDS-PAGE migration is unaffected by DVSF.** *PfJ2*<sup>apt</sup>-*PDI8*<sup>glms</sup> parasites were treated with 3 mM DVSF in 1xPBS for 30 minutes at 37°C, or left untreated as a control, and parasite lysates were used for western blotting. Membranes were probed with antibodies against *PfBiP*. Asterisks (\*) denote nonspecific bands.

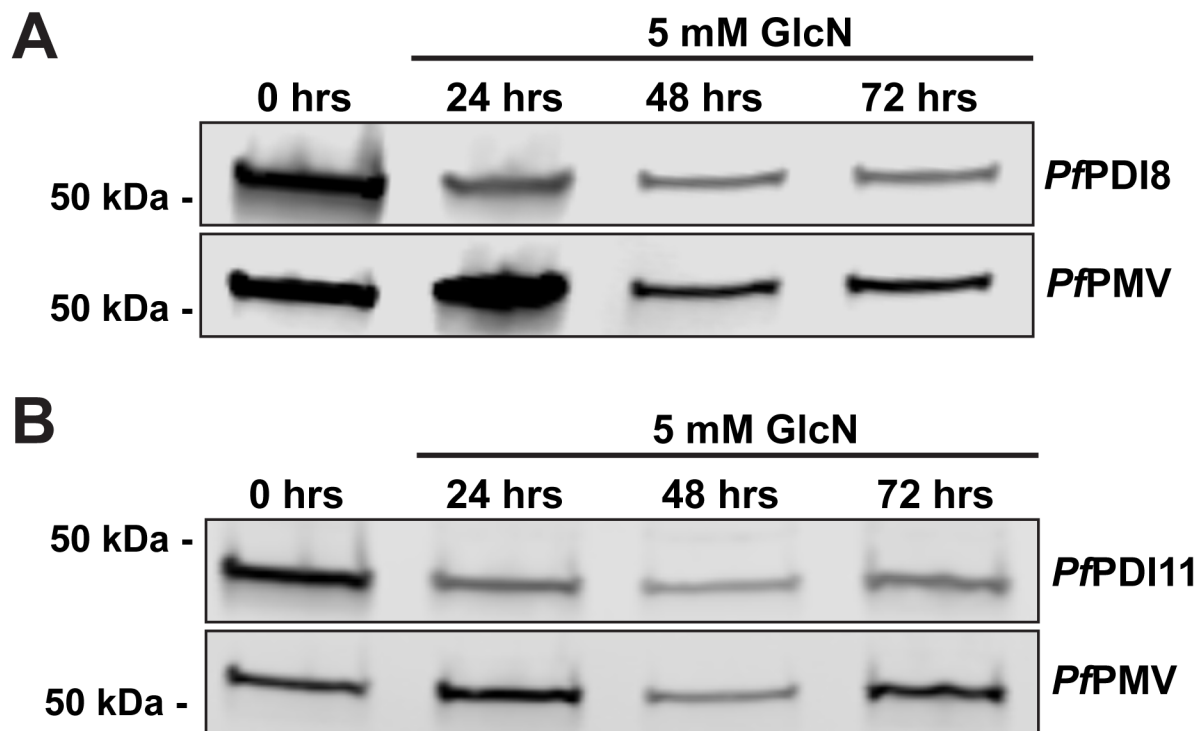

1107  
1108  
1109  
1110  
1111  
1112  
1113  
1114

**Supplementary Figure 4. GlcN treatment leads to knockdown of *PfPDI8* and *PfPDI11*.** Asynchronous *PfJ2<sup>apt</sup>-PDI8<sup>glms</sup>* (top) and *PfJ2<sup>apt</sup>-PDI11<sup>glms</sup>* (bottom) parasites were treated with 5 mM GlcN and samples were taken for western blot analysis at 0 (before addition of GlcN), 24, 48, and 72 hours. Membranes were probed with antibodies for V5 and *PfPMV*.

**A** Over-expression of *wt PfPDI8*:

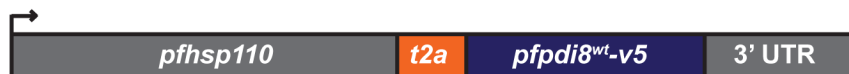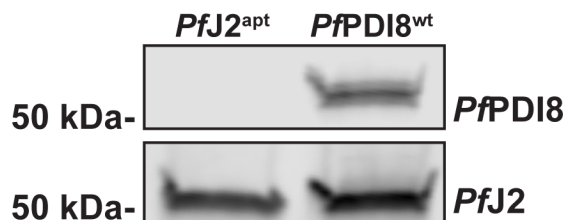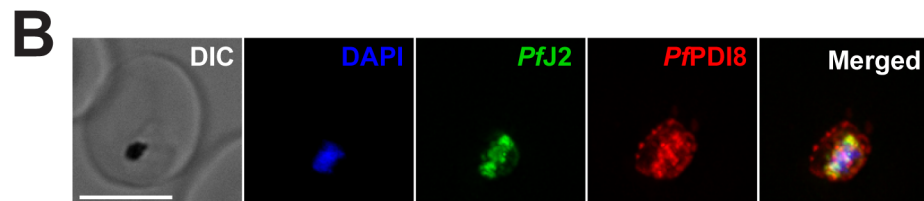

1115  
1116  
1117  
1118

**Supplementary Figure 5. Overexpression of *PfPDI8* results in mislocalization.** A) Top: schematic of exogenous V5-tagged, wild-type *PfPDI8* expression using the

1119 *pfhsp110* (PF3D7\_0708800) locus and a T2A skip peptide in the *PfPDI8*<sup>wt</sup> parasite line,  
 1120 created in the background of *PfJ2*<sup>apt</sup> parasites. Bottom: western blot of parental *PfJ2*<sup>apt</sup>  
 1121 and *PfPDI8*<sup>wt</sup> parasite lysates, probed for antibodies against the V5 tag (*PfPDI8*) and the  
 1122 HA tag (*PfJ2*). **B**) *PfPDI8*<sup>wt</sup> parasites were glutaraldehyde/paraformaldehyde fixed and  
 1123 used for IFA. Staining was carried out using DAPI (blue), antibodies against the HA tag  
 1124 (*PfJ2*, green), and the V5 tag (*PfPDI8*, red). Scale bar represents 5  $\mu$ m.  
 1125

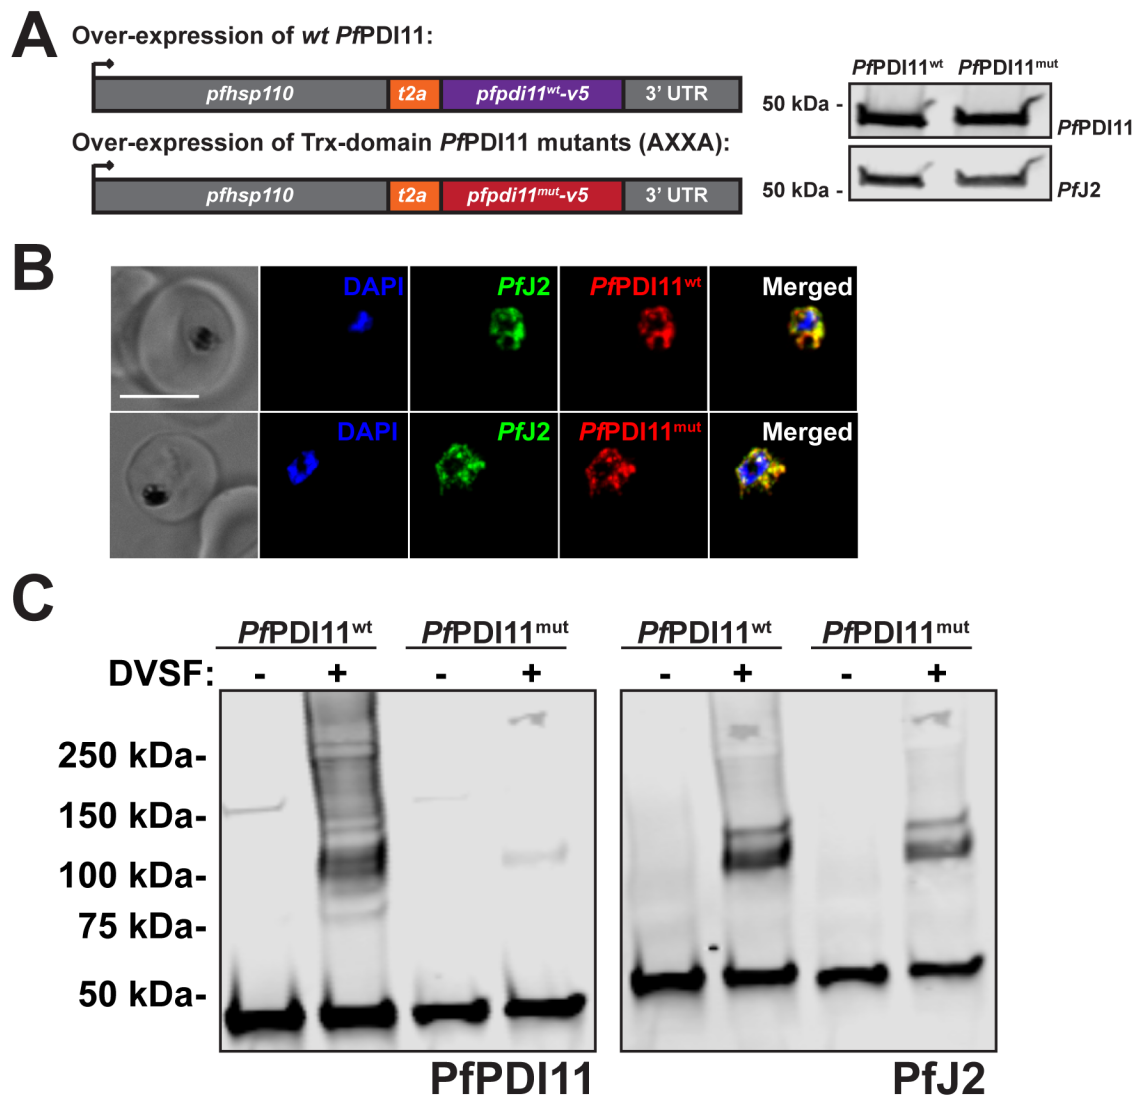

1126  
 1127

1128 **Supplementary Figure 6. Characterization of PfPDI11 overexpression lines. A)** Left:  
 1129 schematic of exogenous V5-tagged, *PfPDI11* expression using the *pfhsp110* (PF3D7\_  
 1130 0708800) locus and a T2A skip peptide in the *PfPDI11*<sup>wt</sup> and *PfPDI11*<sup>mut</sup> parasite lines,  
 1131 created in the background of *PfJ2*<sup>apt</sup> parasites. In *PfPDI11*<sup>mut</sup> parasites, both Trx-domain  
 1132 CXXS active sites were changed to AXXA. Right: western blot of *PfPDI11*<sup>wt</sup> and  
 1133 *PfPDI11*<sup>mut</sup> parasite lysates, probed for antibodies against the V5 tag (*PfPDI11*) and the  
 1134 HA tag (*PfJ2*). **B**) *PfPDI11*<sup>wt</sup> and *PfPDI11*<sup>mut</sup> parasites were  
 1135 glutaraldehyde/paraformaldehyde fixed and used for IFA. Staining was carried out using

1136 DAPI (blue), antibodies against the HA tag (*PfJ2*, green), and the V5 tag (*PfPDI8*, red).  
1137 Scale bar represents 5  $\mu$ m. **C)** *PfPDI11*<sup>wt</sup> and *PfPDI11*<sup>mut</sup> parasites were treated with 3  
1138 mM DVSF in 1x PBS for 30 minutes at 37°C, then parasite lysates used for western  
1139 blotting. Membranes were probed with antibodies against the V5 tag (*PfPDI11*) and the  
1140 HA tag (*PfJ2*).  
1141

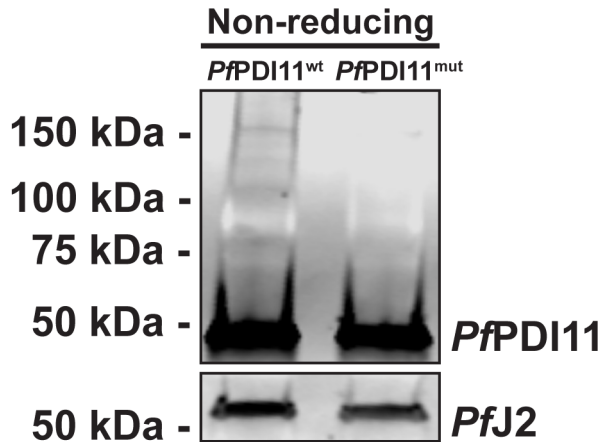

1142  
1143  
1144  
1145  
1146  
1147  
1148

**Supplementary Figure 7. PfPDI11 non-reducing western blots.** Saponin-isolated *PfPDI11*<sup>wt</sup> and *PfPDI11*<sup>mut</sup> parasites were dissolved in protein loading dye lacking a reducing agent and used for western blotting. Membranes were probed with antibodies against the V5 tag (*PfPDI11*) and the HA tag (*PfJ2*).

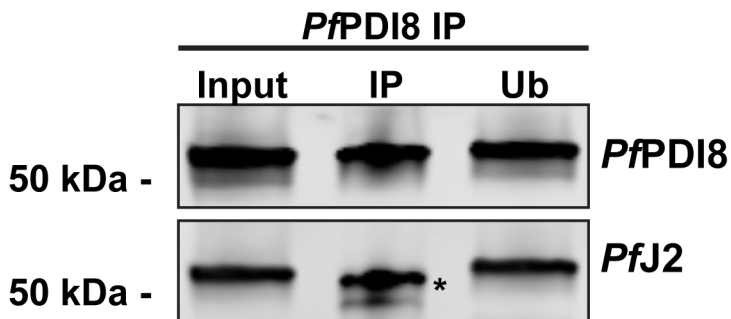

1149  
1150  
1151  
1152  
1153  
1154  
1155  
1156  
1157

**Supplementary Figure 8. Immunoprecipitation of PfPDI8.** *PfPDI8* and interacting proteins were immunoprecipitated from *PfJ2*<sup>apt</sup>-*PDI8*<sup>gImS</sup> parasite lysate using anti-V5 antibodies. The pre-IP input sample, the sample eluted from the antibodies (IP), and the sample removed from the beads containing the unbound proteins (Ub) were used for western blotting. Membranes were probed with antibodies against V5 and HA. The asterisk (\*) denotes the heavy chain of the antibody used for immunoprecipitation.

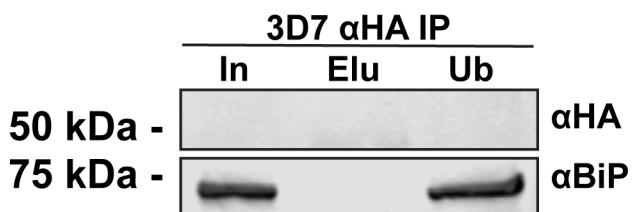

1158

1159  
1160  
1161  
1162  
1163  
1164  
1165

**Supplementary Figure 9. Anti-HA BiP IP.** 3D7 parasite lysates were used for anti-HA immunoprecipitation (IP). The pre-IP input sample (In), the sample eluted from the antibodies (Elu), and the sample removed from the beads containing the unbound proteins (Ub) were used for western blotting. Membranes were probed with antibodies against HA and *Pf*BiP.

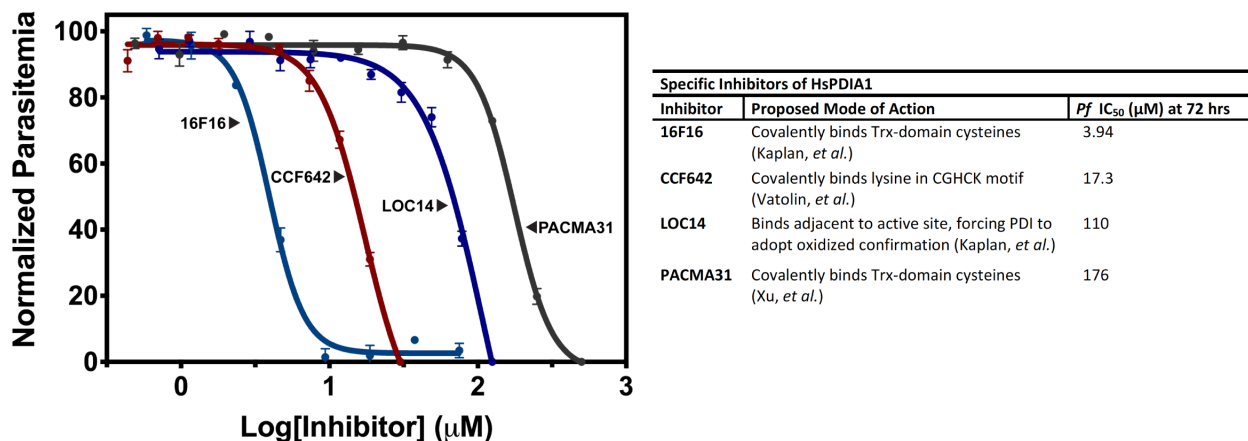

1166  
1167  
1168  
1169  
1170  
1171  
1172  
1173  
1174  
1175  
1176  
1177

**Supplementary Figure 10. PDI Inhibitor IC<sub>50</sub>s.** Left: Asynchronous 3D7 parasites were incubated in various concentrations of human PDI inhibitors. Each data point represents the mean parasitemia at a given concentration, in technical triplicate, at 72 hours. Error bars, which are not shown for data points in which they are smaller than the circle symbol, represent standard deviation from the mean. Representative IC<sub>50</sub> curves are shown for each drug. Experiments were performed in biological triplicate. Right: table describing each of the human PDI inhibitors used and their calculated *P. falciparum* IC<sub>50</sub> values.
